# Supplementary material for: Aggregation-enhanced emissive mechanofluorochromic carbazole-halogen positional isomers: tunable fluorescence via conformational polymorphism and crystallization-induced fluorescence switching
Source: Royal Society of Chemistry journal article supplement (doi:10.1039/c9ce01227c), 2019-01-01
Supplement: c9ce01227c1.pdf [file c9ce01227c1.pdf]

### Aggregation Enhanced Emissive Mechanofluorochromic Carbazole-Halogen Positional Isomers: Tunable Fluorescence via Conformational Polymorphism and Crystallization Induced Fluorescence Switching

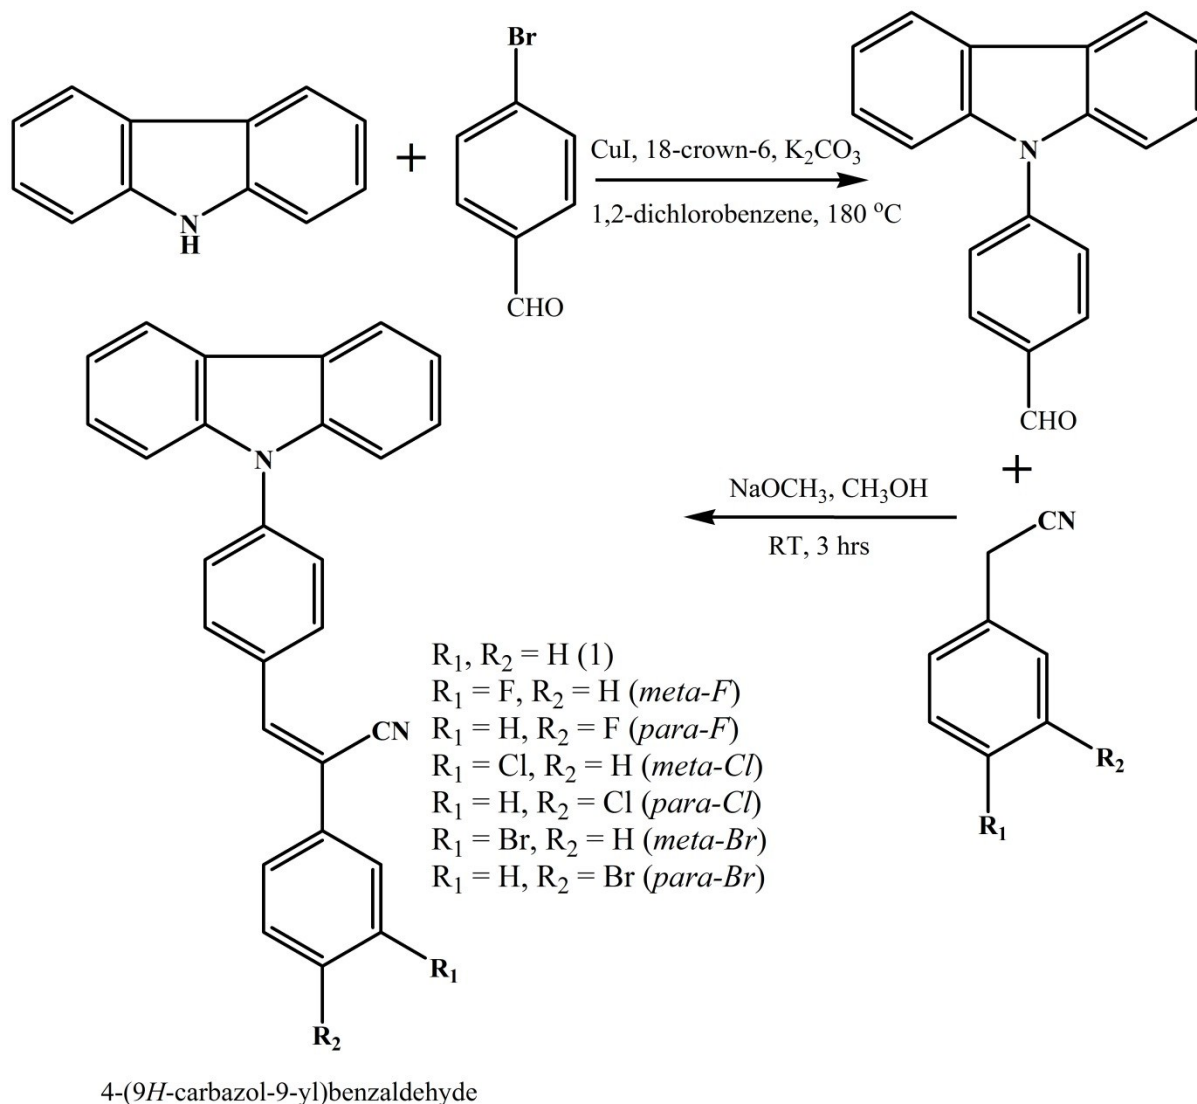

Figure S1. Synthesis of carbazole based halogen substituted positional isomers.

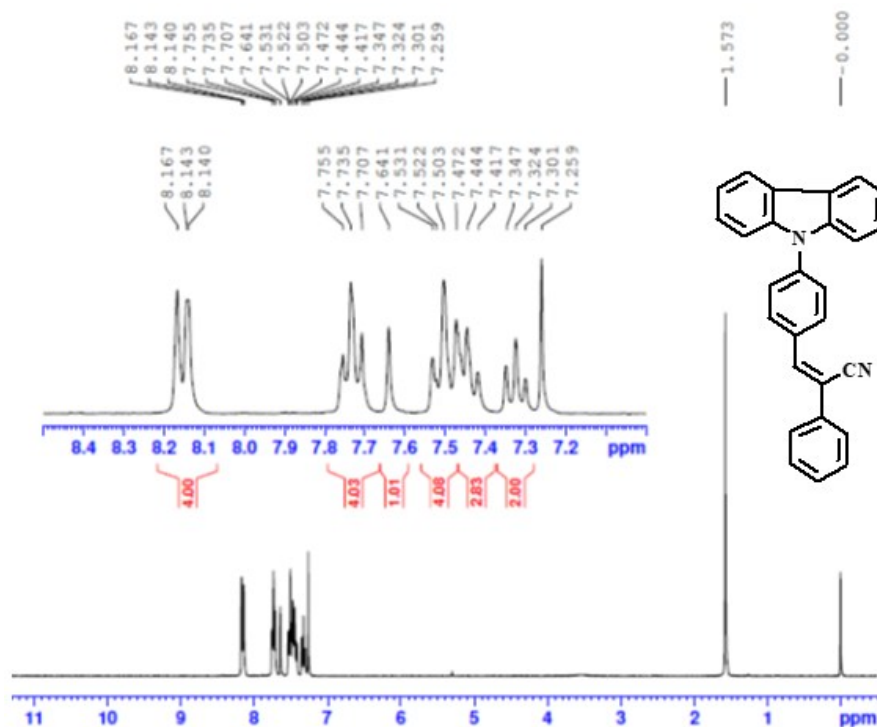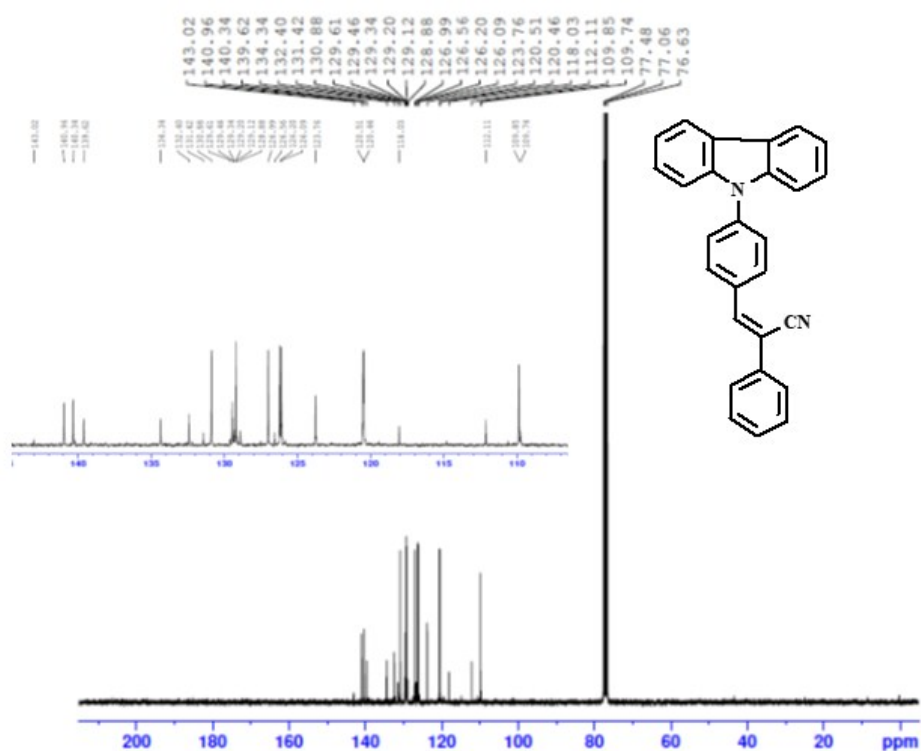

$^1\text{H}$  and  $^{13}\text{C}$  NMR of **1**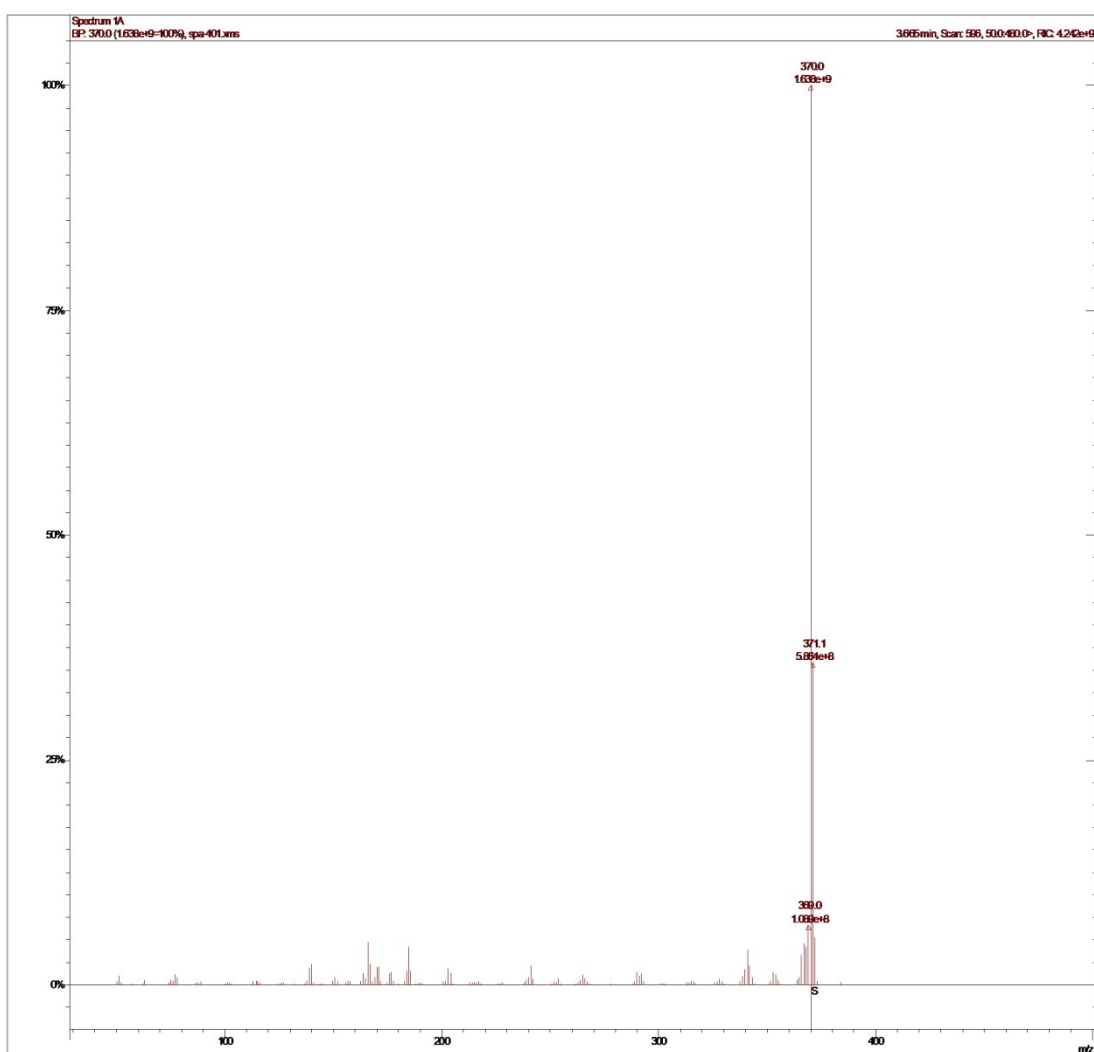Mass spectrum of **H**.



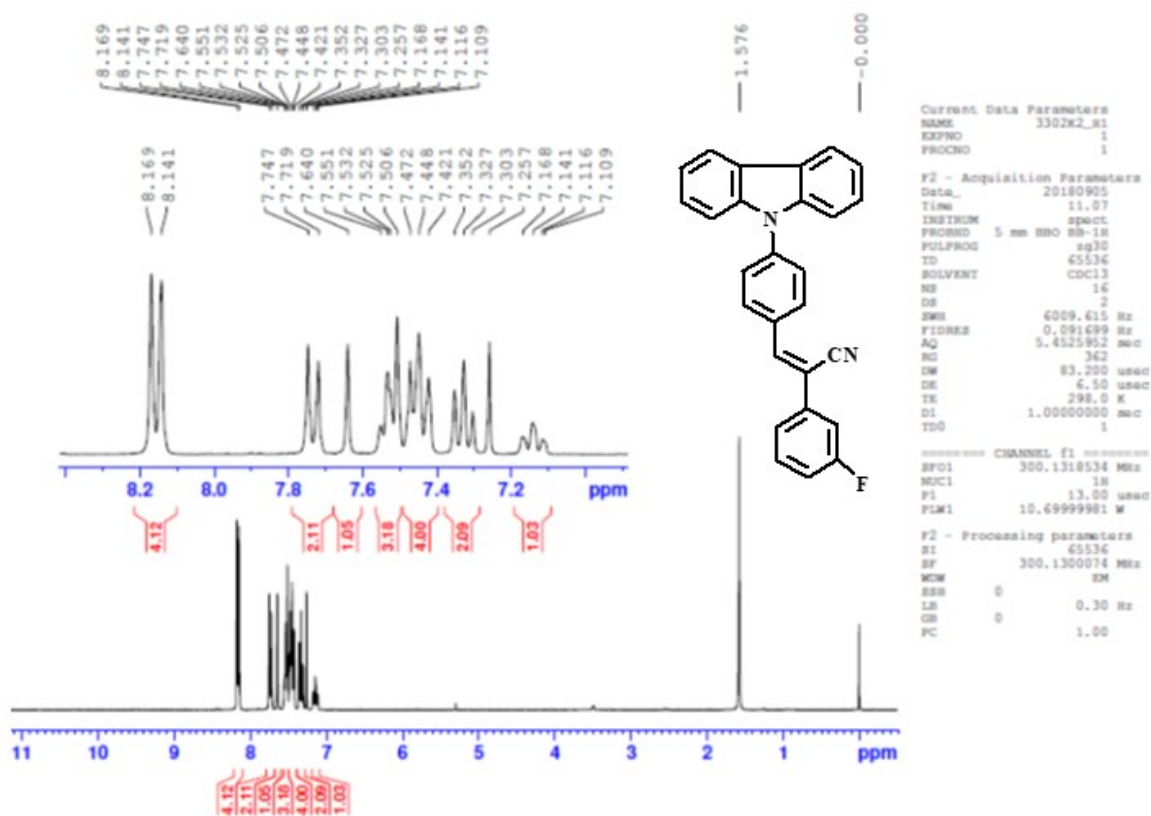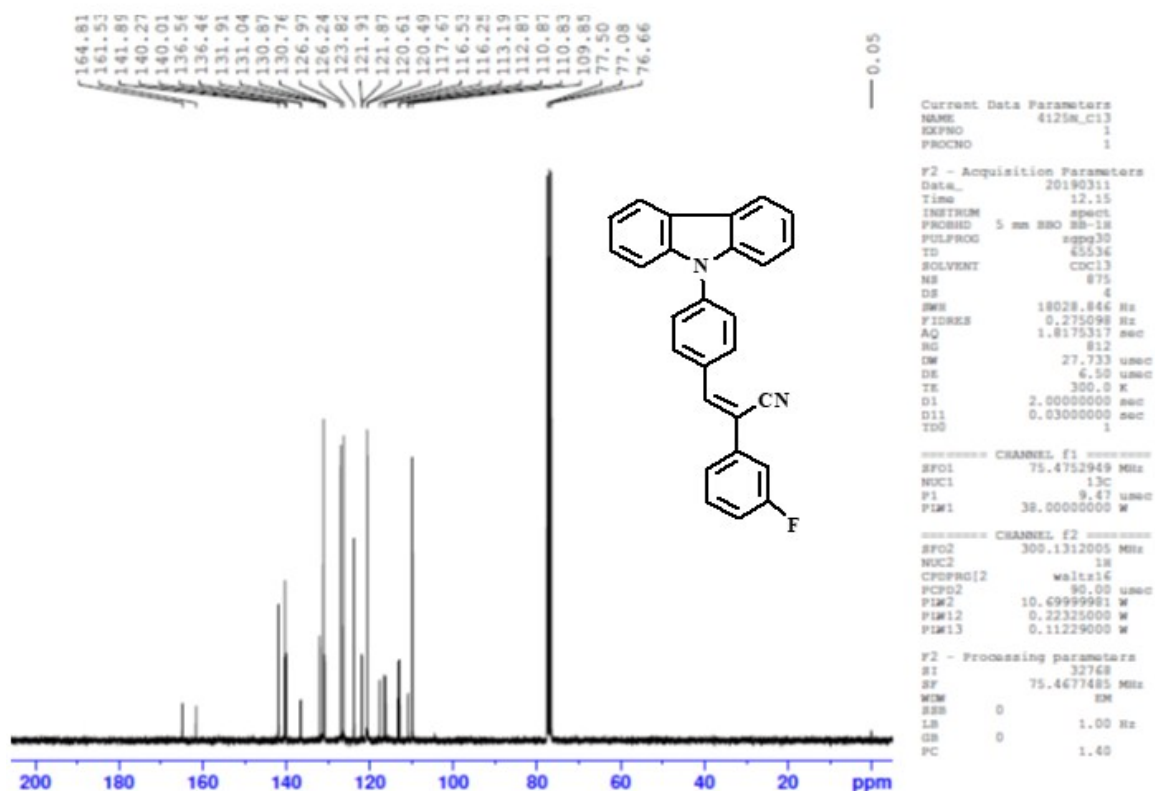

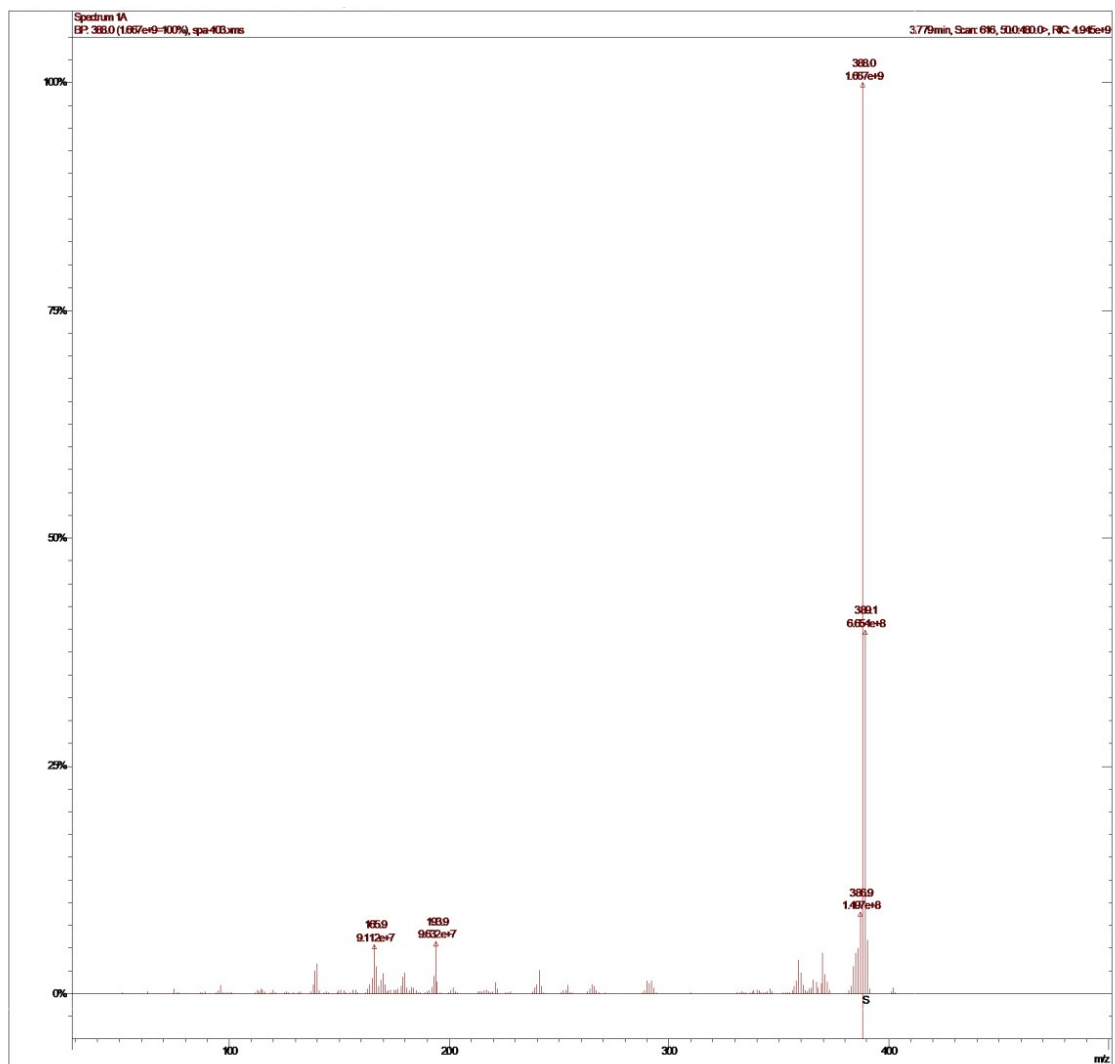

Mass spectrum of *meta-F*.

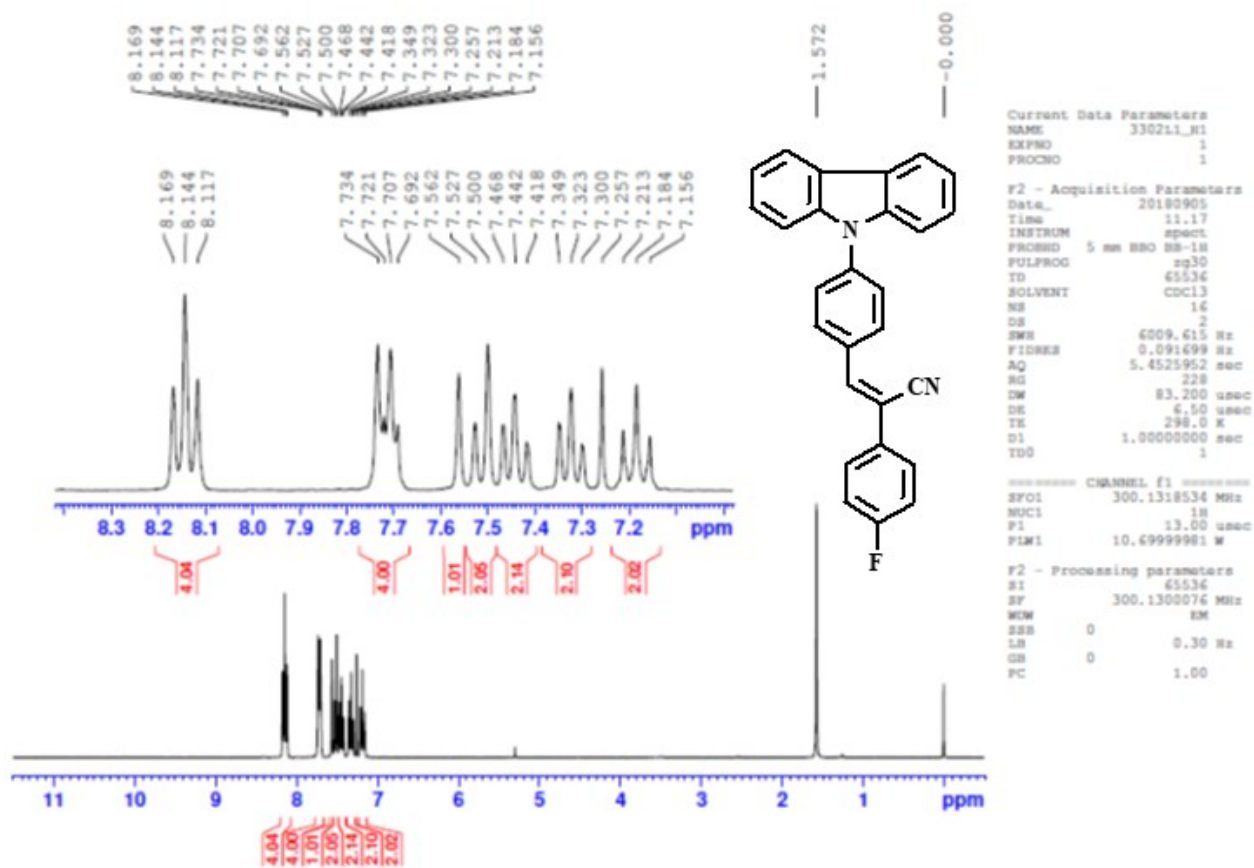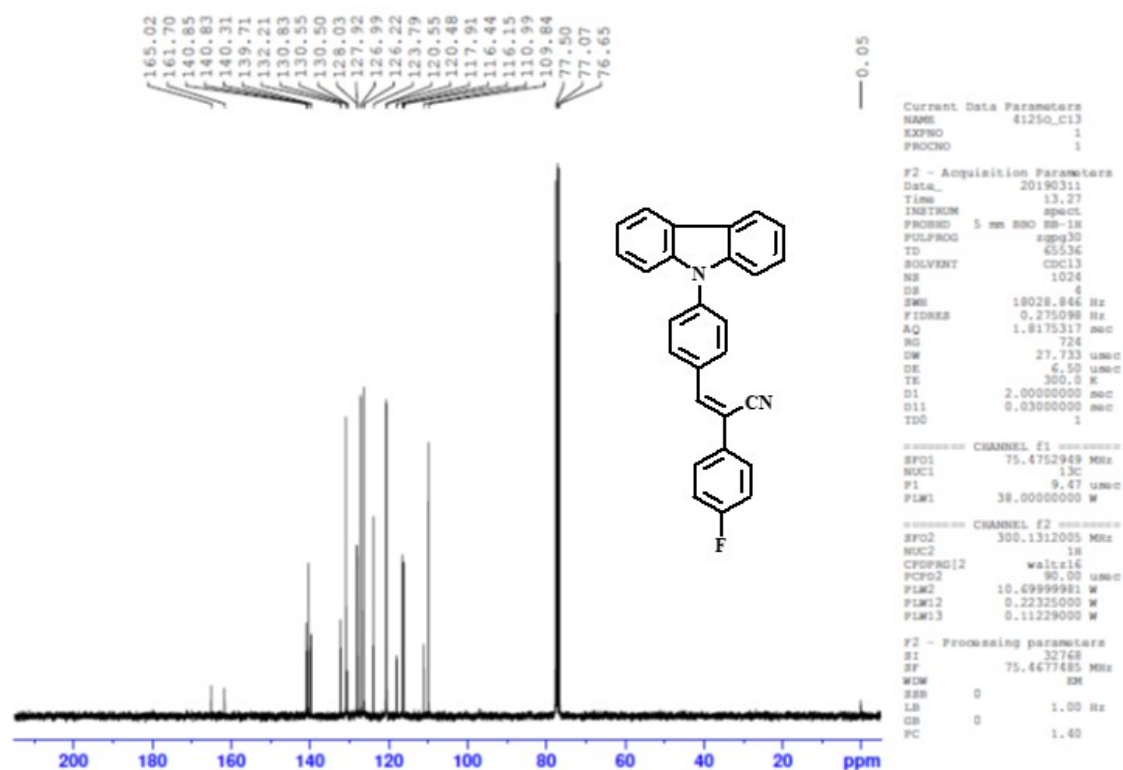

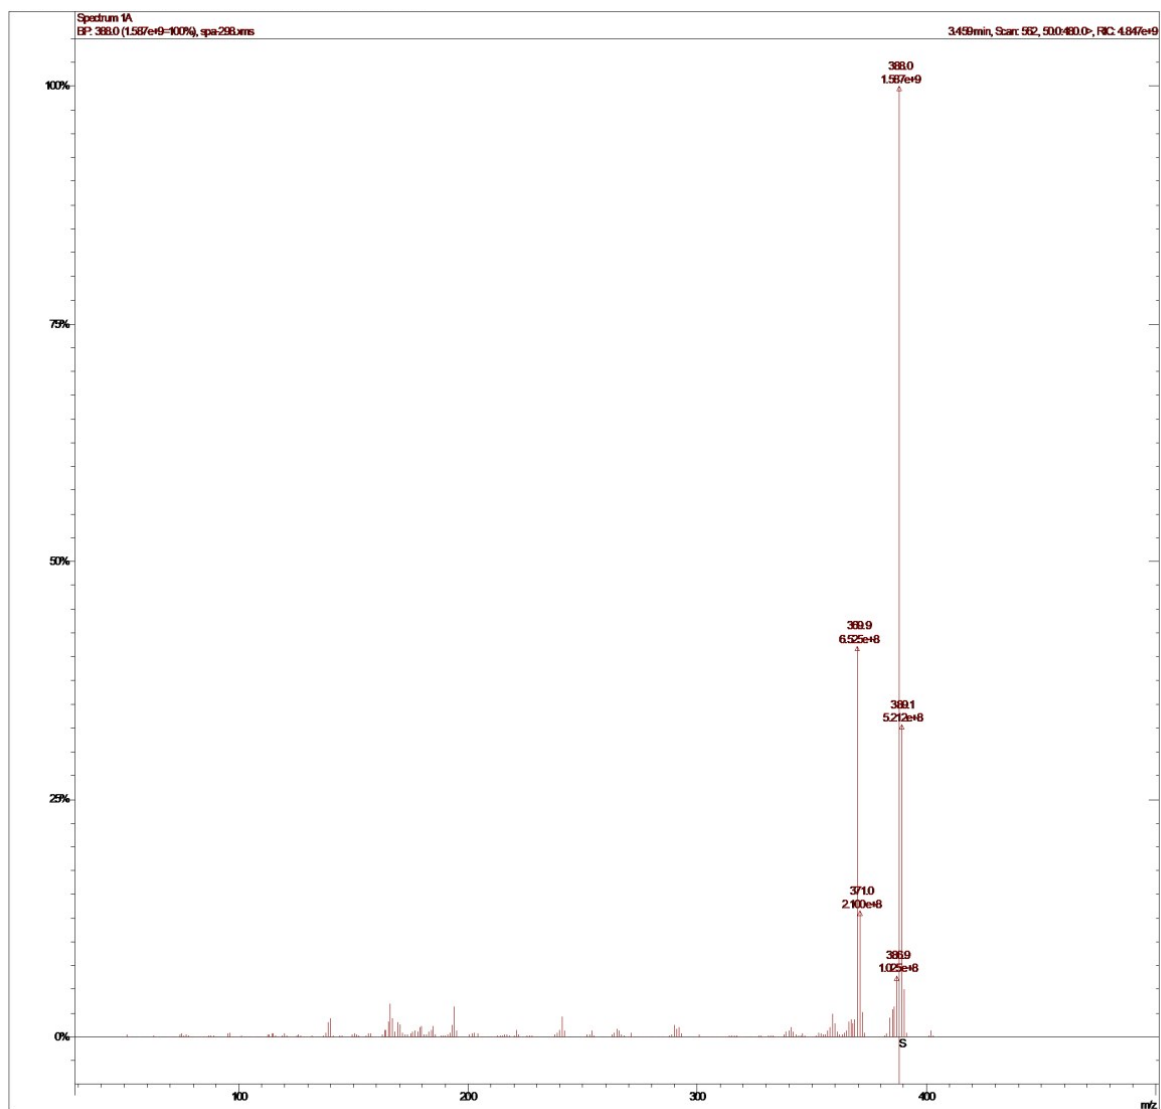

Mass spectrum of *para-F*.



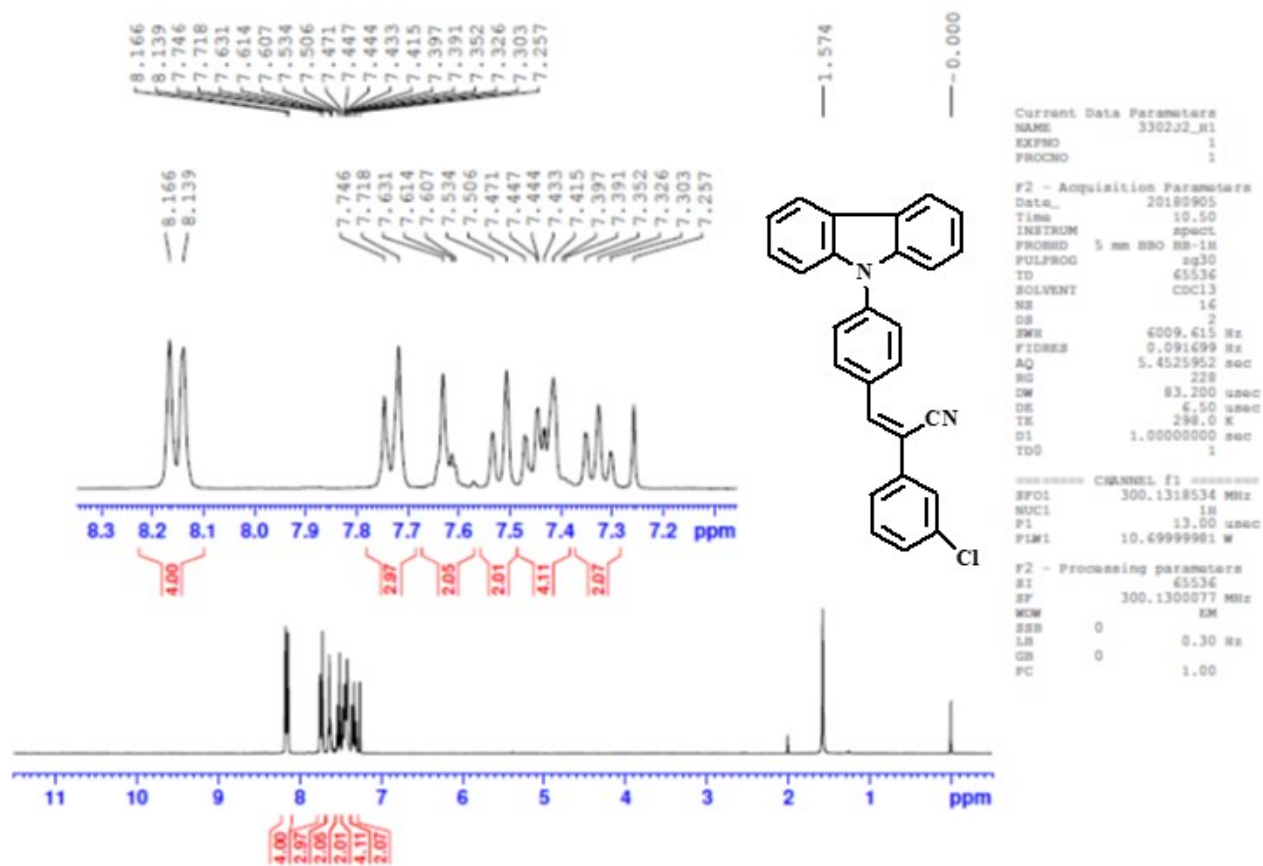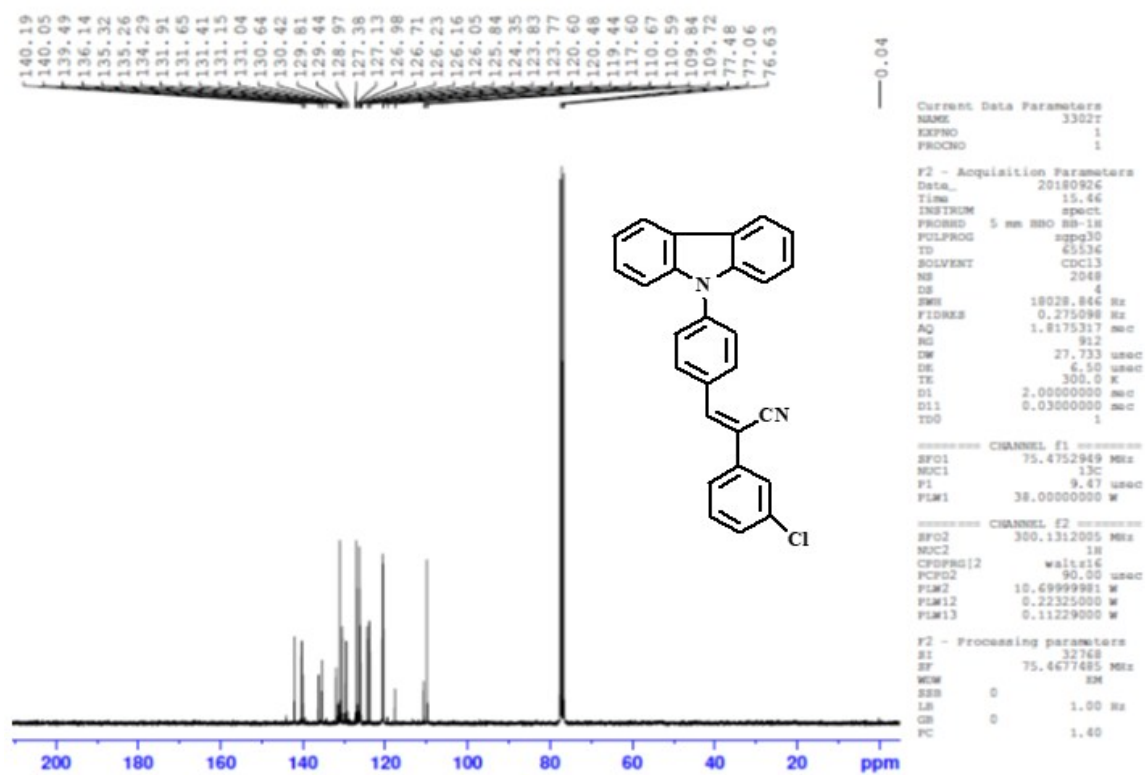

$^1\text{H}$  and  $^{13}\text{C}$  NMR of *meta*-Cl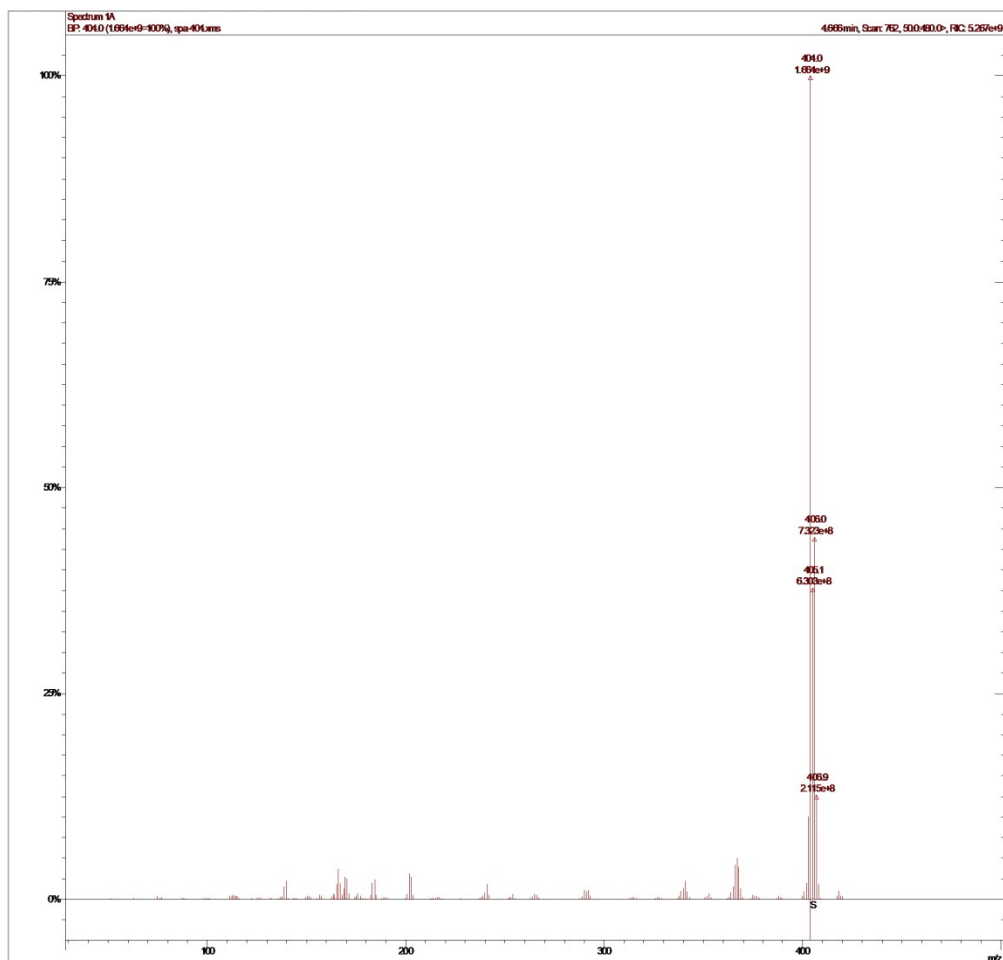Mass spectrum of *meta*-Cl.

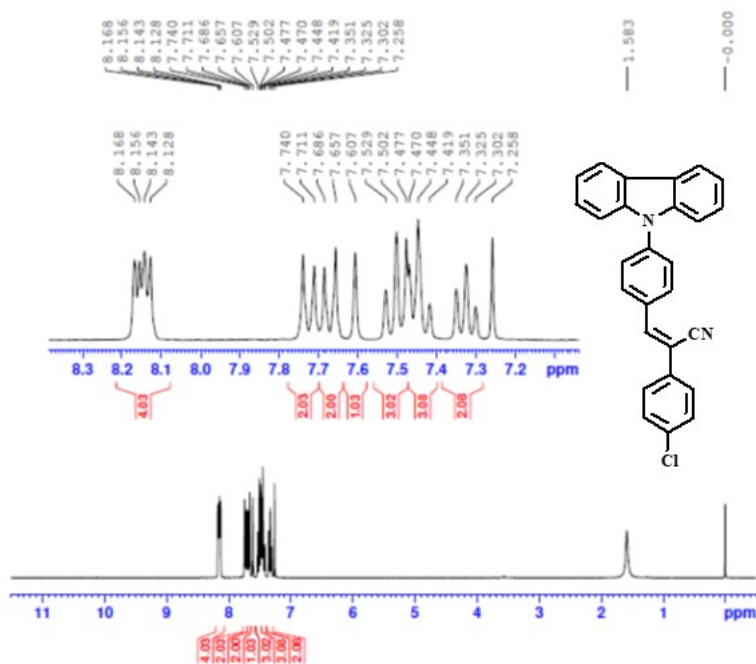

```

Current Data Parameters
NAME      3302k1_m1
EXPNO    1
PROCNO   1

F2 - Acquisition Parameters
Date_    20180905
Time     10.58
INSTRUM  spect
PROBHD   5 mm BBO BB-1H
PULPROG  zg30
TD        65536
SOLVENT  CDCl3
NS        16
DS        2
SWH       6009.615 Hz
FIDRES    0.091699 Hz
AQ        5.452592 sec
RG        606
BW        83.200 usec
DE        6.50 usec
TE        298.0 K
D1        1.0000000 sec
D11       1
TD0       1

===== CHANNEL f1 =====
SFO1     300.1318534 MHz
NUC1     1H
P1       13.00 usec
PLW1    10.69999981 W

F2 - Processing parameters
SI       300.1300573 MHz
SF       300.1300573 MHz
WDW      EM
SSB      0
LB       0.30 Hz
GB       0
PC       1.00
    
```

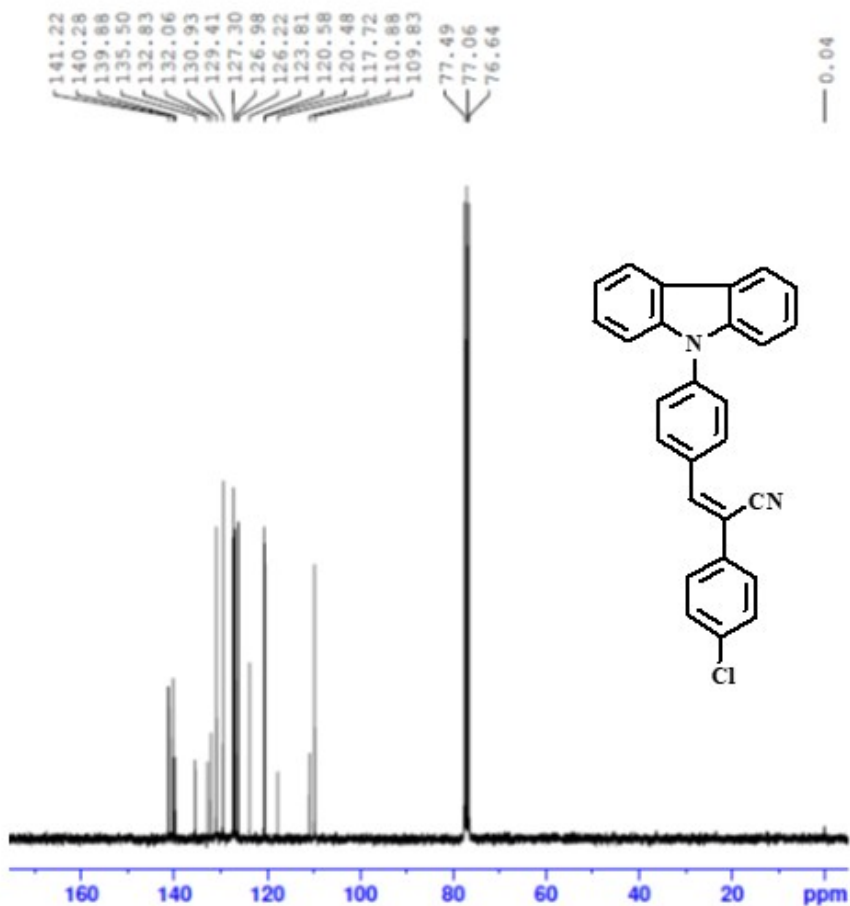

```

Current Data Parameters
NAME      4125f_c13
EXPNO    1
PROCNO   1

F2 - Acquisition Parameters
Date_    20190311
Time     17.11
INSTRUM  spect
PROBHD   5 mm BBO BB-1H
PULPROG  zgpg30
TD        65536
SOLVENT  CDCl3
NS        1024
DS        4
SWH       18028.846 Hz
FIDRES    0.275098 Hz
AQ        1.8175317 sec
RG        724
BW        27.733 usec
DE        6.50 usec
TE        300.0 K
D1        2.0000000 sec
D11       0.0300000 sec
TD0       1

===== CHANNEL f1 =====
SFO1     75.4752949 MHz
NUC1     13C
P1       9.47 usec
PLW1    38.00000000 W

===== CHANNEL f2 =====
SFO2     300.1312005 MHz
NUC2     1H
PCPD2    waltz16
PCPD2    90.00 usec
PLW2    10.69999981 W
PLW12   0.22325000 W
PLW13   0.11229000 W

F2 - Processing parameters
SI       32768
SF       75.4677485 MHz
WDW      EM
SSB      0
LB       1.00 Hz
GB       0
PC       1.40
    
```

$^1\text{H}$  and  $^{13}\text{C}$  NMR of *para*-Cl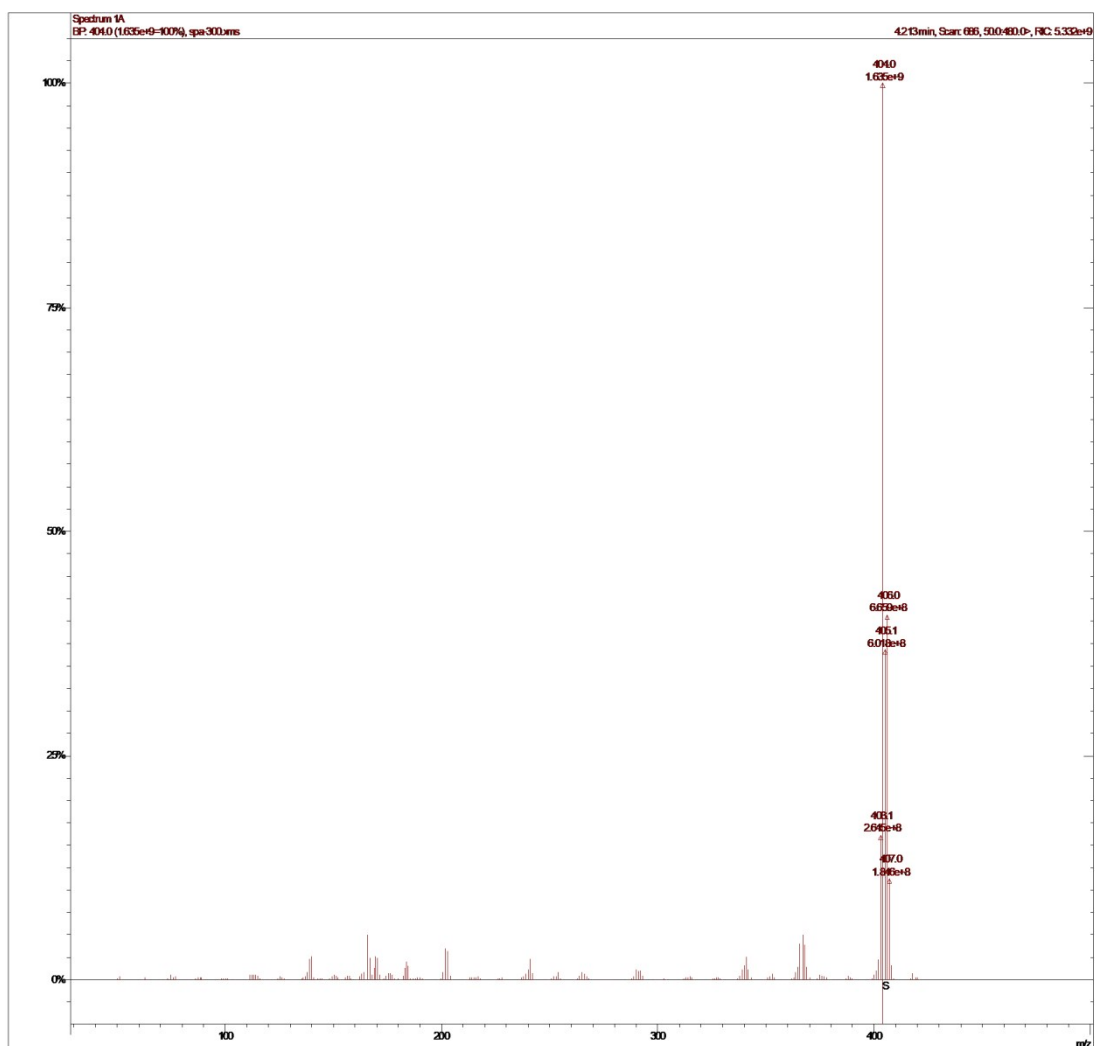Mass spectrum of *para*-Cl.

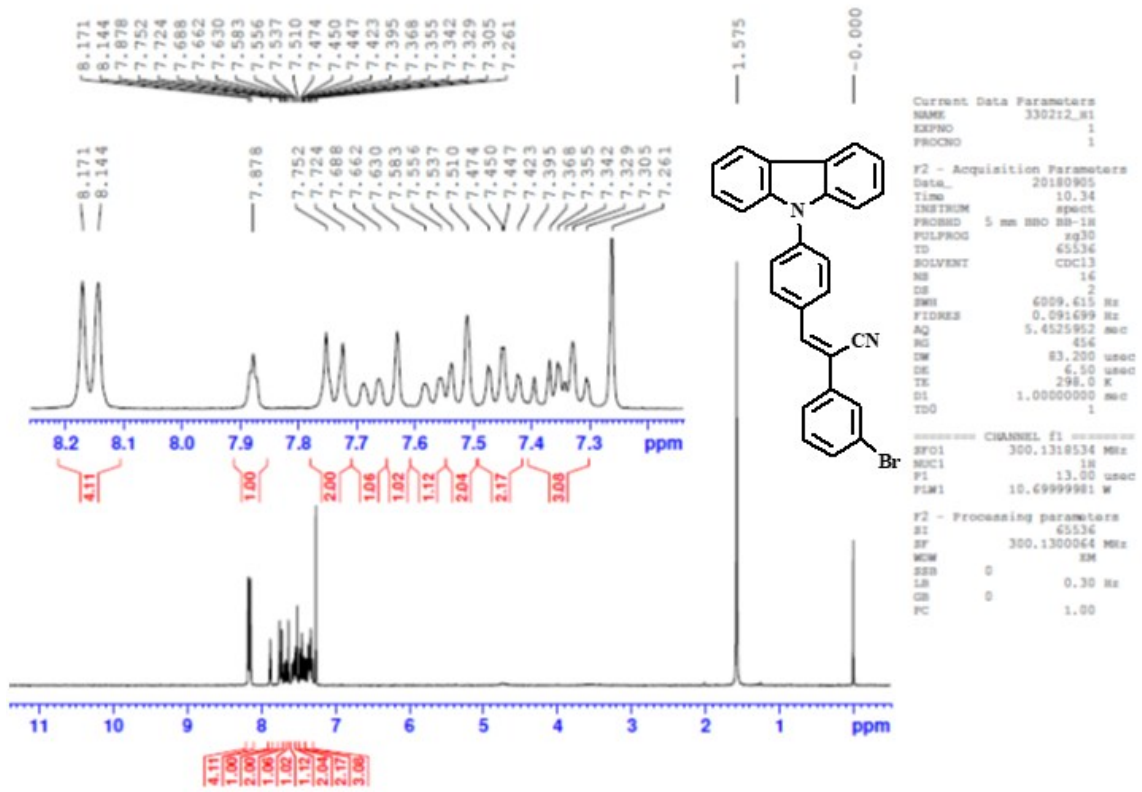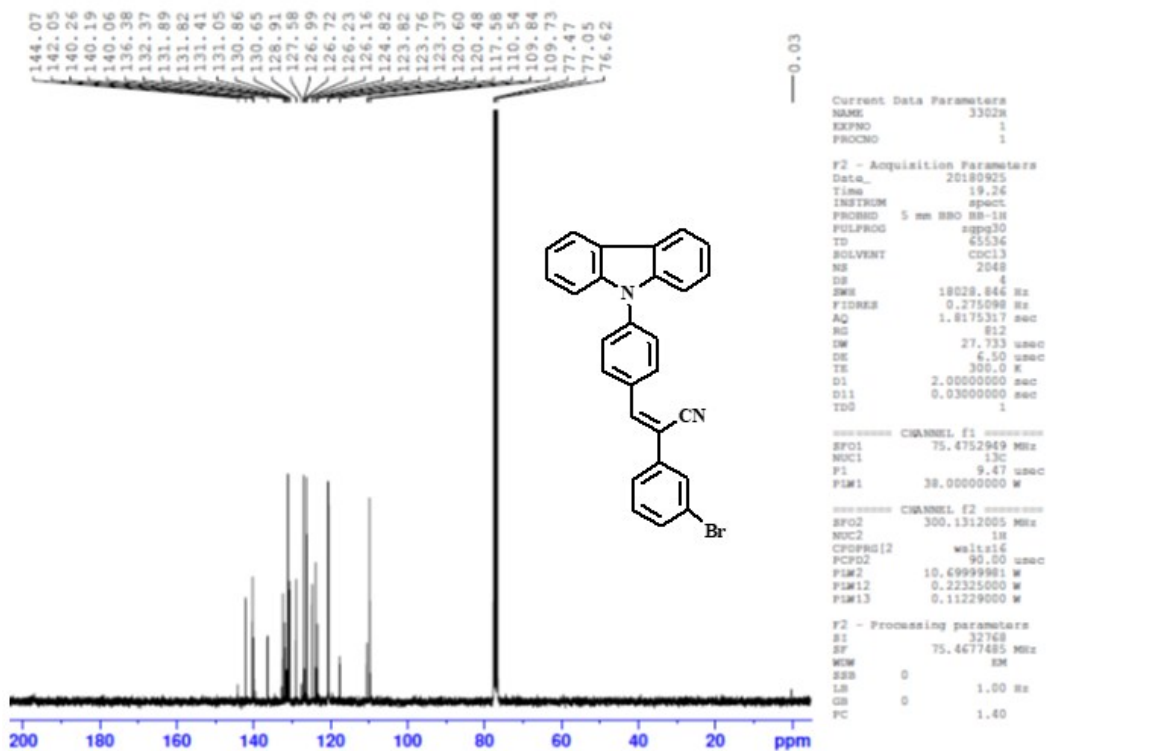

$^1\text{H}$  and  $^{13}\text{C}$  NMR of *meta*-Br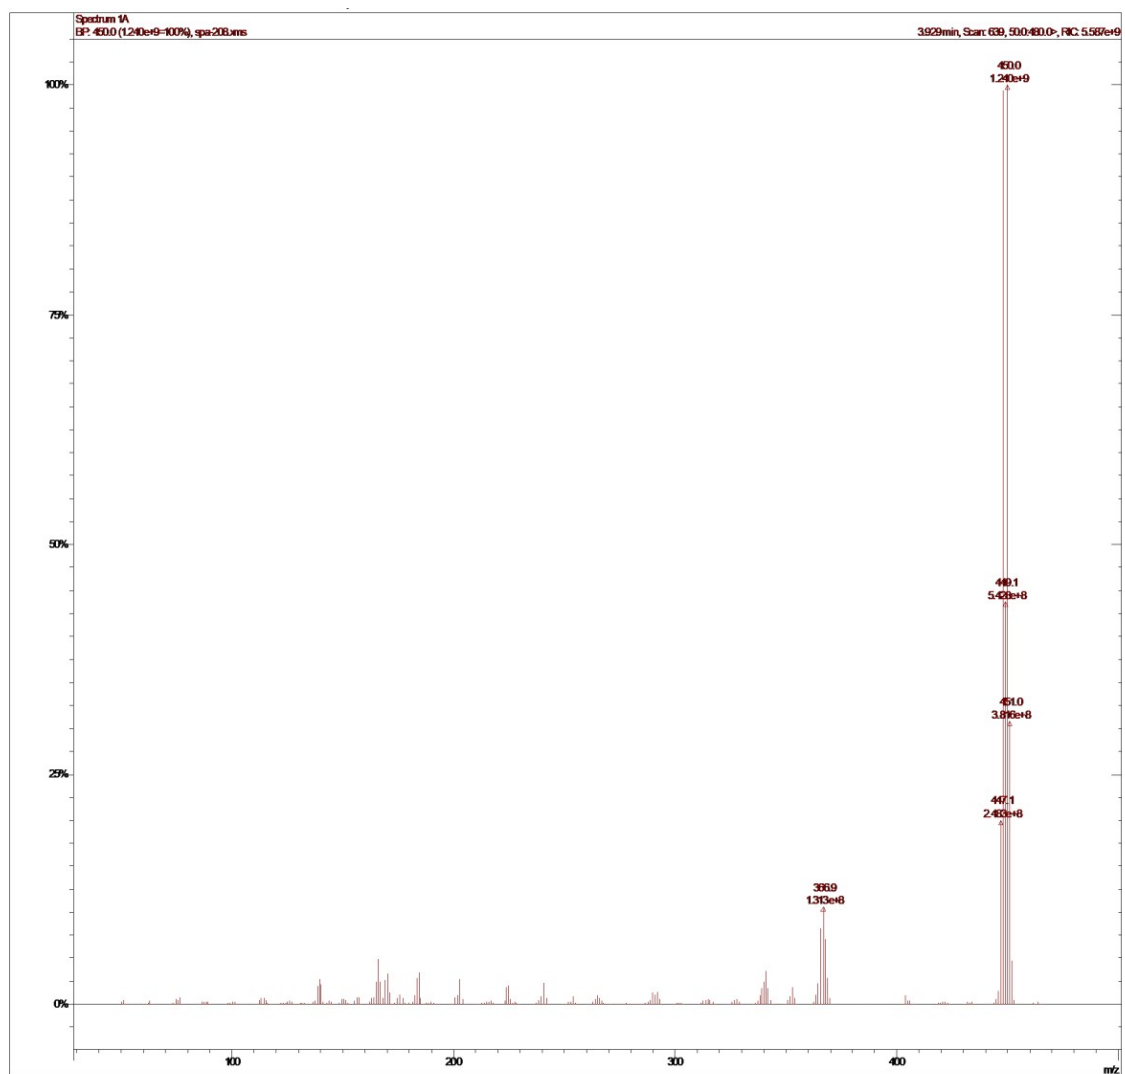

Mass spectrum of *meta-Br*.

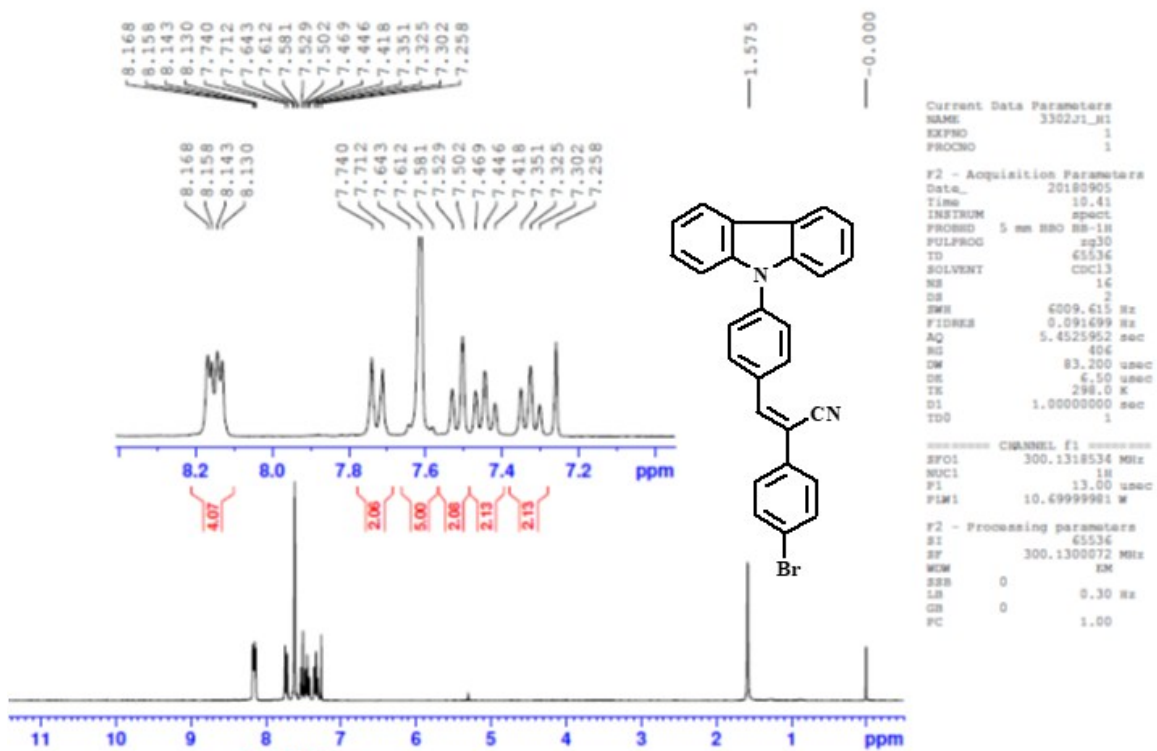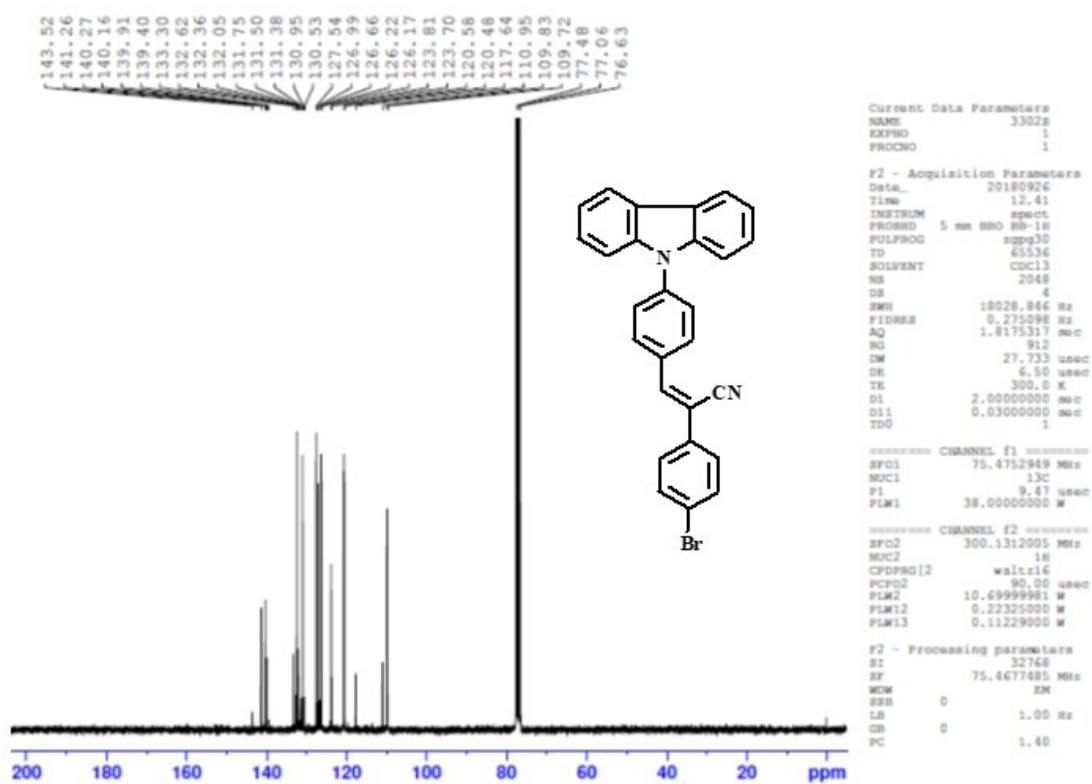



$^1\text{H}$  and  $^{13}\text{C}$  NMR of *para*-Br

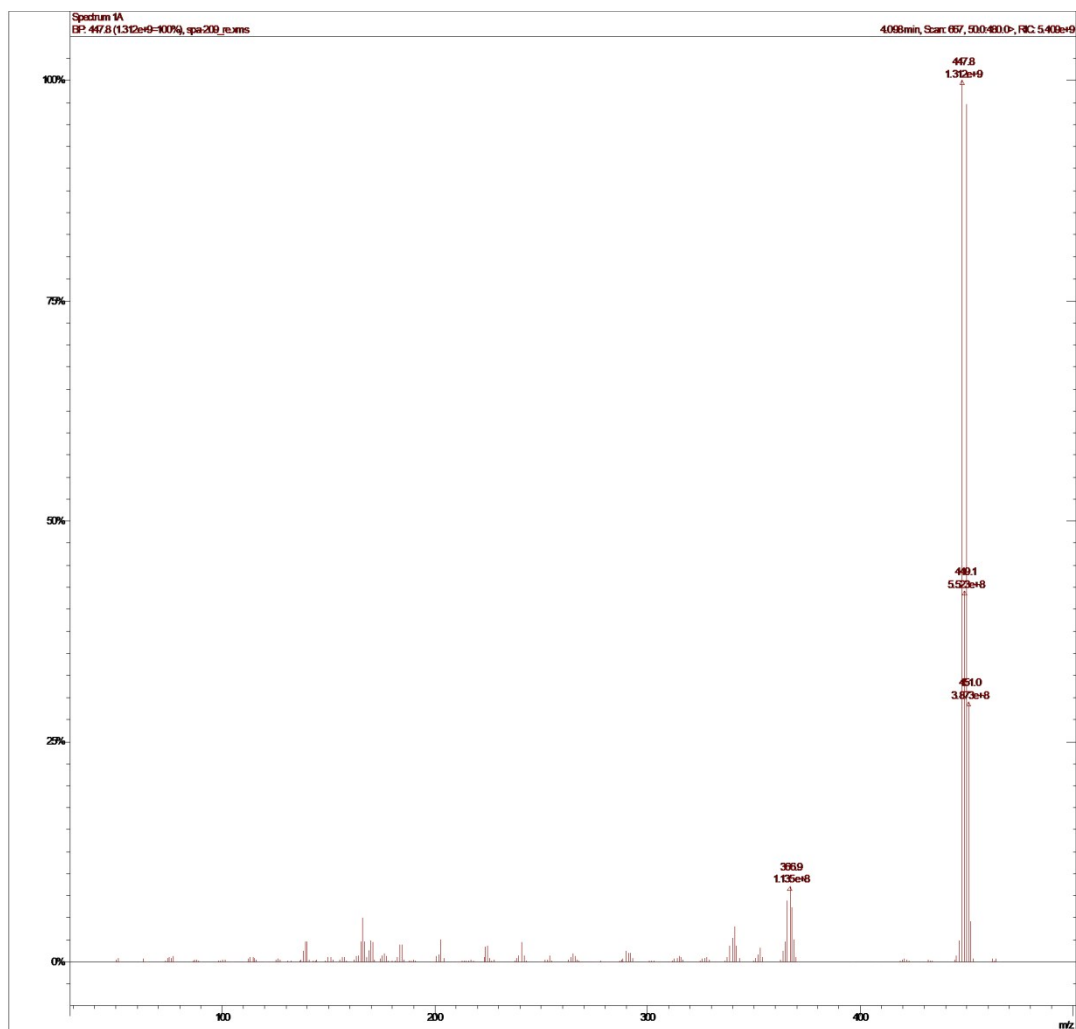

Mass spectrum of *para-Br*.

Table S1. Absolute quantum yield ( $\Phi_f$ ) of halogen positional isomers at different stimuli.

|                   | Absolute quantum yield ( $\Phi_f$ ) |         |        |        |        |                    |        |
|-------------------|-------------------------------------|---------|--------|--------|--------|--------------------|--------|
|                   | Crystals                            | Crushed | Heated | Melted | Heated | Slightly scratched | Heated |
| H-B               | 25.37                               | 21.97   | 27.20  | 7.39   | 19.18  | 13.32              | 23.85  |
| H-G               | 31.32                               |         |        |        |        |                    |        |
| <i>meta</i> -F-B  | 21.10                               | 18.25   | 20.99  | 6.03   | 17.65  | 14.97              | 23.36  |
| <i>meta</i> -F-G  | 19.46                               |         |        |        |        |                    |        |
| <i>para</i> -F-B  | 19.36                               | 18.25   | 20.46  | 9.23   | 18.95  | 13.78              | 23.69  |
| <i>para</i> -F-G  | 20.72                               |         |        |        |        |                    |        |
| <i>meta</i> -Cl-B | 25.13                               | 18.37   | 26.36  | 8.12   | 26.56  | 15.55              | 23.39  |
| <i>meta</i> -Cl-G | 28.40                               |         |        |        |        |                    |        |
| <i>para</i> Cl-B  | 26.37                               | 20.18   | 25.21  | 7.69   | 18.89  | 14.63              | 22.87  |
| <i>para</i> Cl-G  | 25.81                               |         |        |        |        |                    |        |
| <i>meta</i> -Br   | 15.67                               | 5.39    | 13.23  | 2.89   | 6.65   | 5.69               | 10.25  |
| <i>para</i> -Br-B | 21.55                               | 12.67   | 20.01  | 2.54   | 15.50  | 11.54              | 19.23  |
| <i>para</i> -Br-G | 20.72                               |         |        |        |        |                    |        |

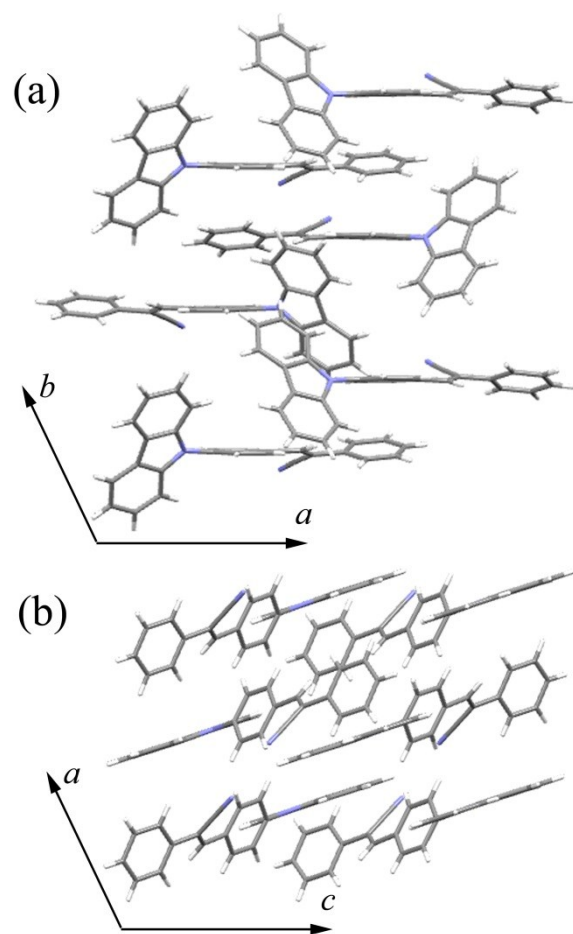

Figure S2. Molecular packing of (a) H-B and (b) H-G in the crystal lattice. C (grey), N (blue) and H (white).

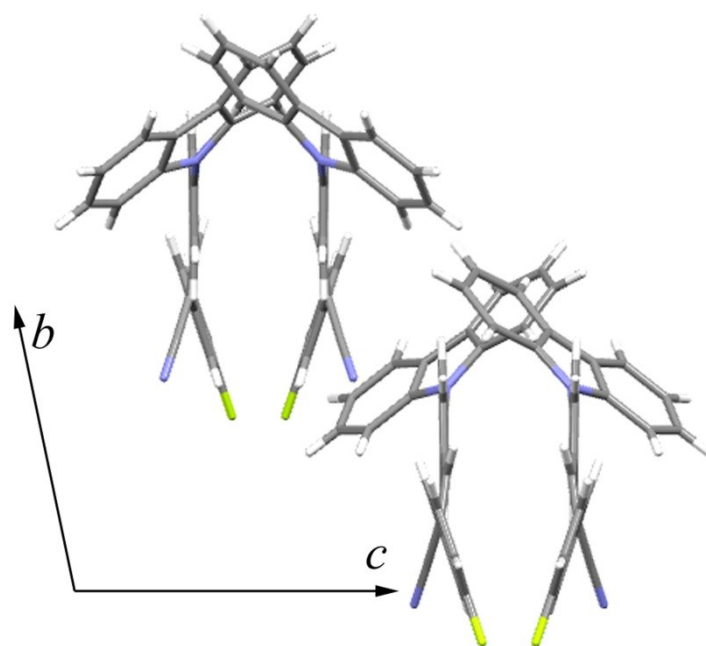

Figure S3. Molecular packing of *meta*-F-B in the crystal lattice. C (grey), N (blue), H (white) and F (yellow).

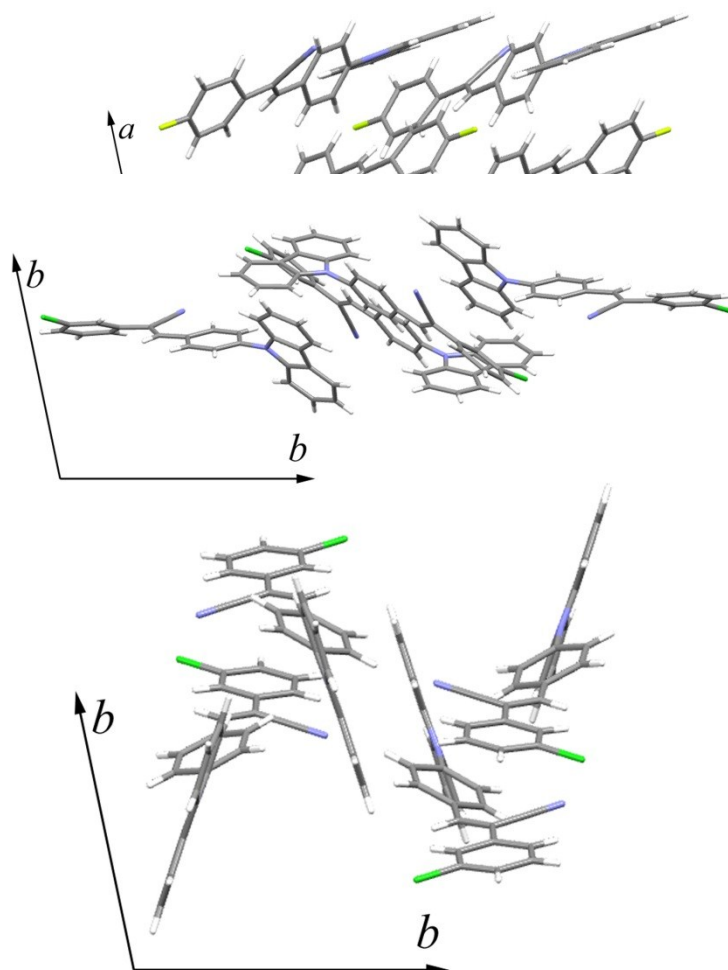

Figure  
packing  
of (a)  
F-G. C

S4. Molecular  
in the crystal lattice  
*para*-F-B and *para*-  
(grey), N (blue), H

(white) and F (yellow).

Figure S5. Molecular packing in the crystal lattice of (a) *meta*-Cl-B and *meta*-Cl-G. C (grey), N (blue), H (white) and Cl (green).

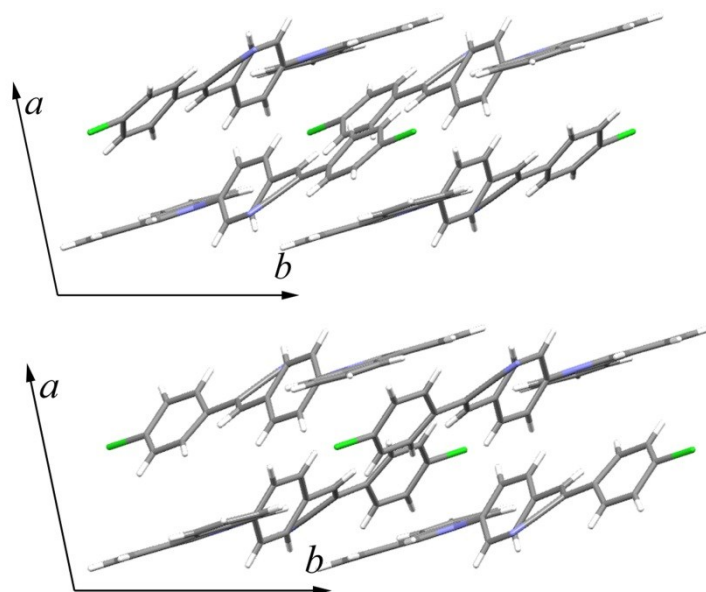

Figure S6. Molecular packing in the crystal lattice of (a) *para*-Cl-B and *para*-Cl-G. C (grey), N (blue), H (white) and Cl (green).

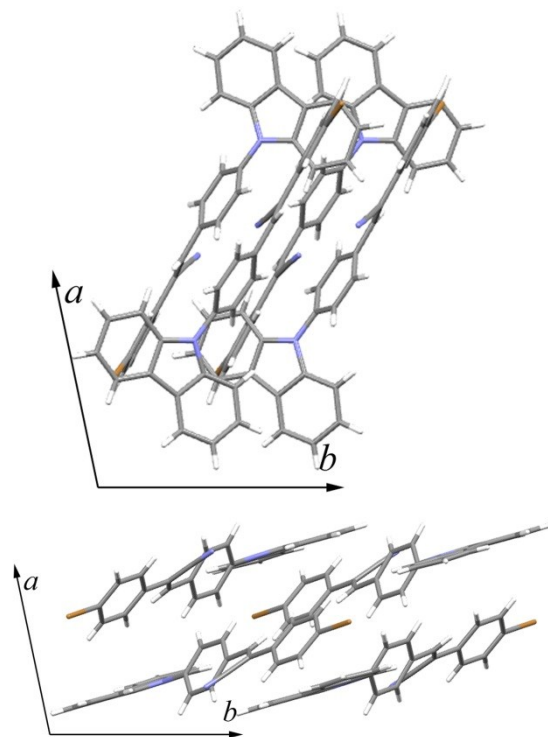

Figure S7. Molecular packing in the crystal lattice of (a) *meta*-Br and *para*-Br-B. C (grey), N (blue), H (white) and Br (orange).

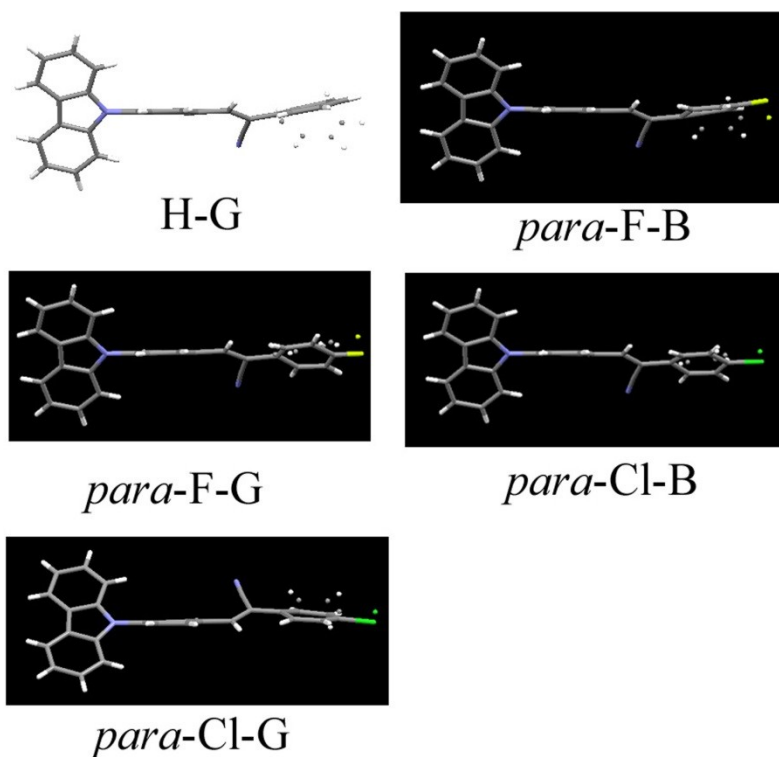

Figure S8. Disorder in the crystal lattice of different derivatives.

Table S2. Computationally calculated optical band gap of H and halogen isomers.

| <b>B3PW91/<br/>6-31+G(d,p)</b> | <b>HOMO</b> | <b>LUMO</b> | <b>band gap (eV)</b> |
|--------------------------------|-------------|-------------|----------------------|
| H-B                            | -5.738      | -2.427      | 3.31                 |
| H-G                            | -5.741      | -2.475      | 3.27                 |
| <i>meta</i> -F-B               | -5.454      | -2.221      | 3.23                 |
| <i>para</i> -F-B               | -5.807      | -2.517      | 3.29                 |
| <i>para</i> -F-G               | -5.776      | -2.515      | 3.26                 |
| <i>meta</i> -Cl-B              | -5.830      | -2.662      | 3.17                 |
| <i>meta</i> -Cl-G              | -5.797      | -2.636      | 3.16                 |
| <i>para</i> -Cl-B              | -5.813      | -2.578      | 3.24                 |
| <i>para</i> -Cl-G              | -5.777      | -2.617      | 3.16                 |
| <i>meta</i> -Br                | -5.516      | -2.281      | 3.24                 |
| <i>para</i> -Br-B              | -5.489      | -2.417      | 3.07                 |

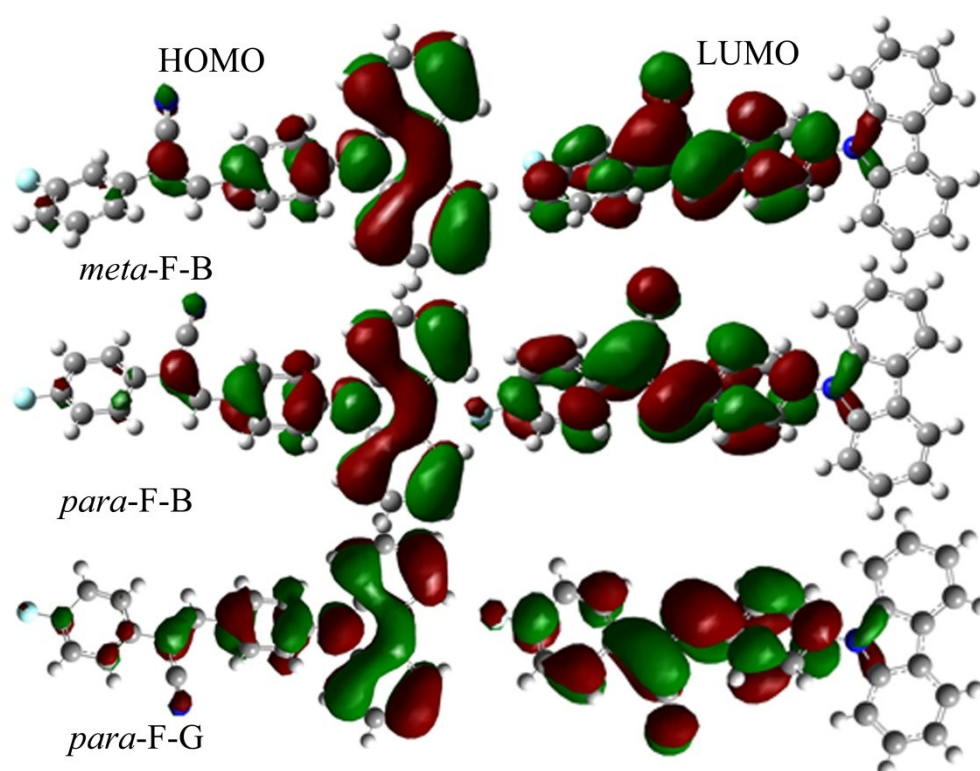

Figure S9. HOMO-LUMO molecular orbital diagram.



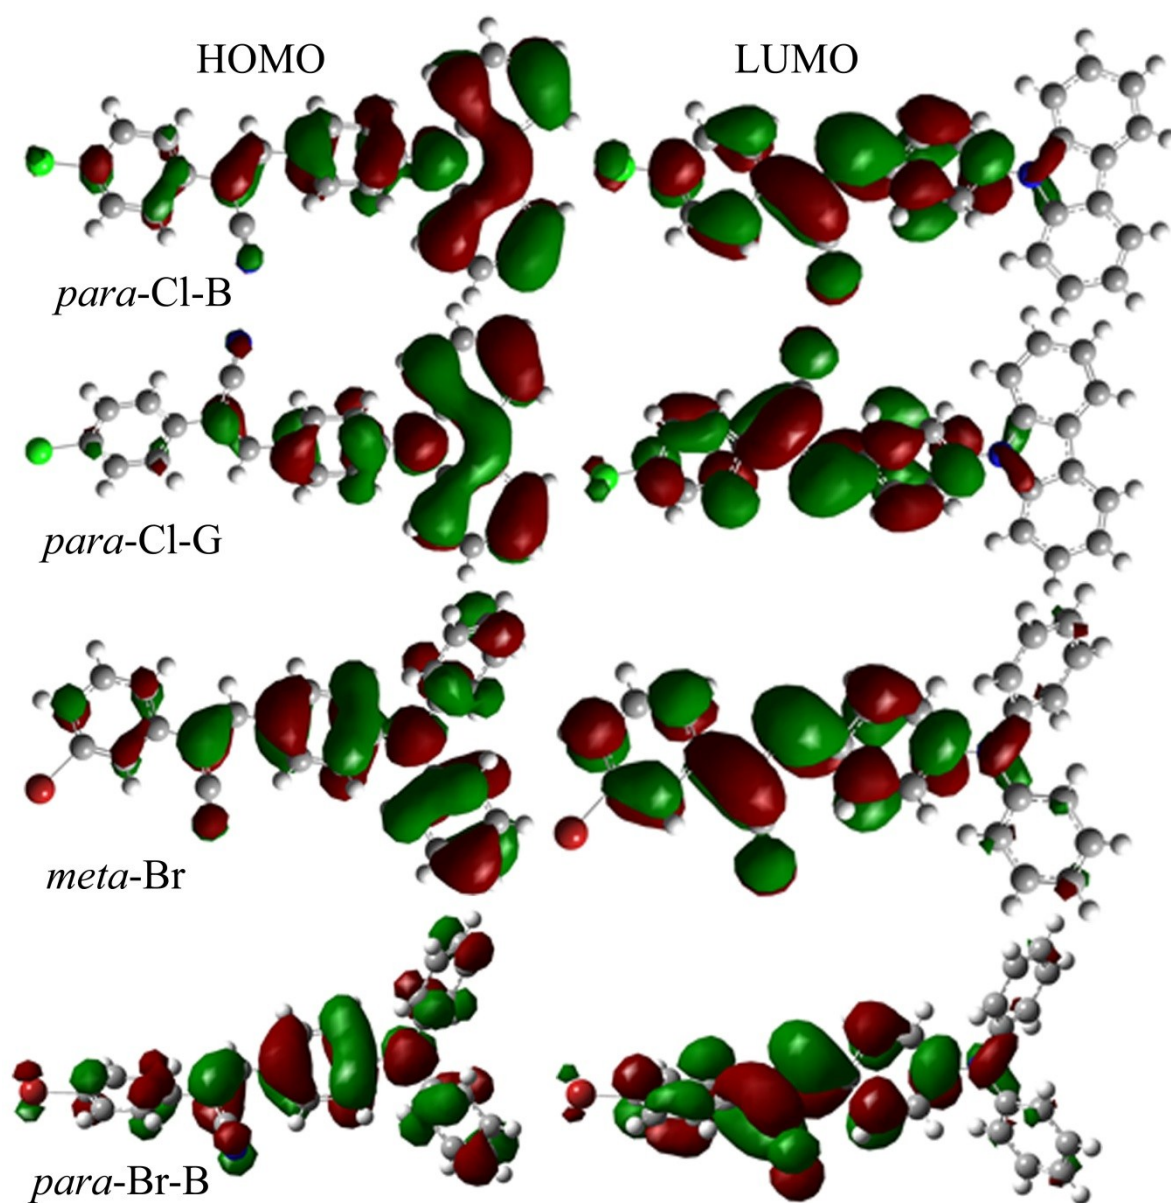

Figure S10. HOMO-LUMO molecular orbital diagram.

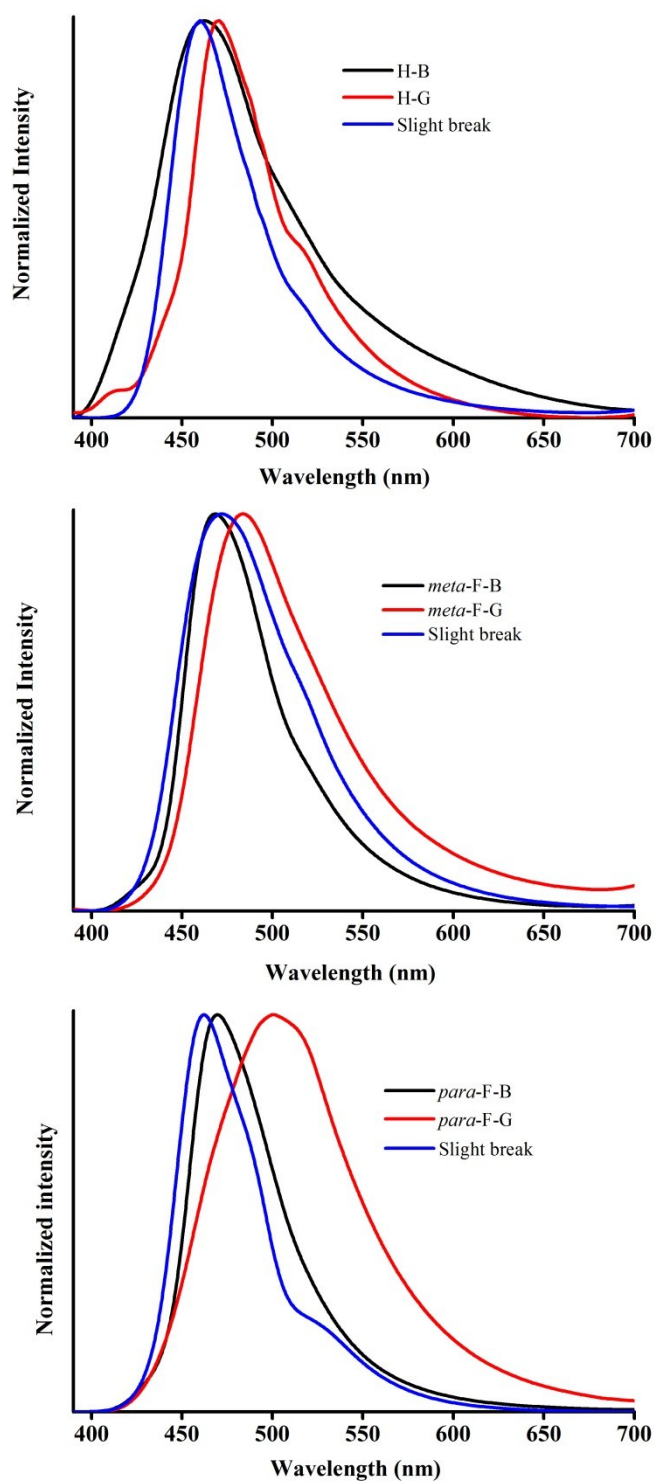

Figure S11. Solid state fluorescence spectra of blue, green and slight breaking of green polymorphs.  $\lambda_{\text{ex}} = 360$  nm.

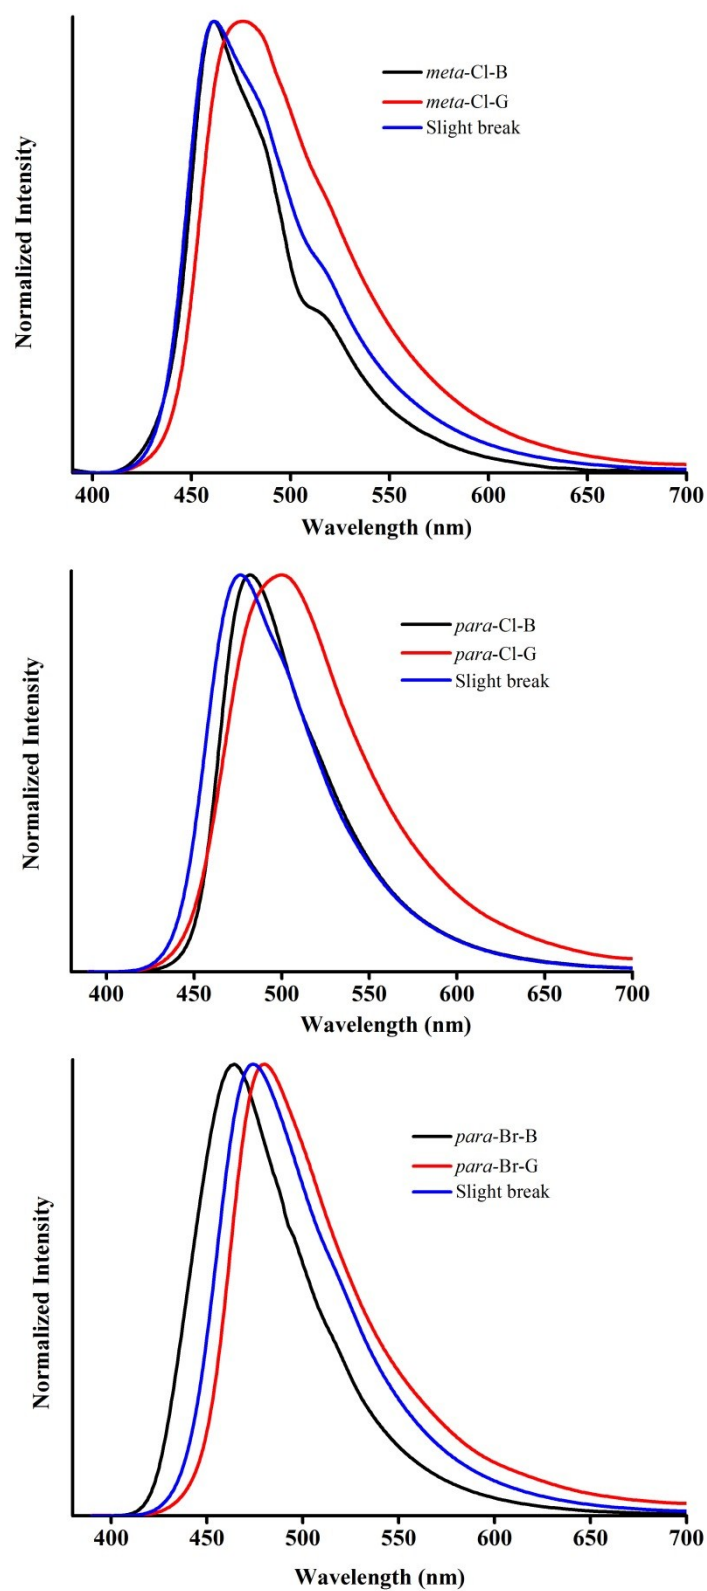

Figure S12. Solid state fluorescence spectra of blue, green and slight breaking of green polymorphs.  $\lambda_{\text{ex}} = 360$  nm.

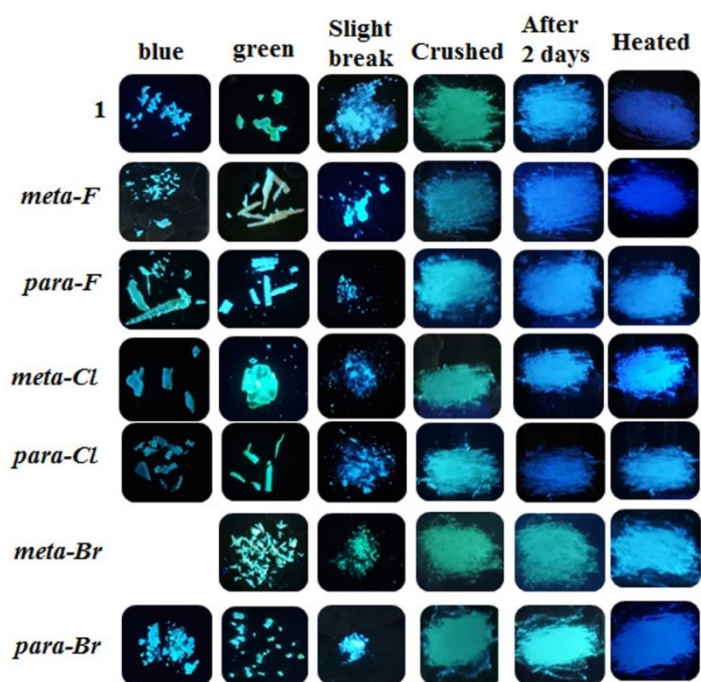

Figure S13. Digital images of stimuli responsive fluorescence changes of halogen positional isomers.  $\lambda_{\text{ex}} = 365 \text{ nm}$ .

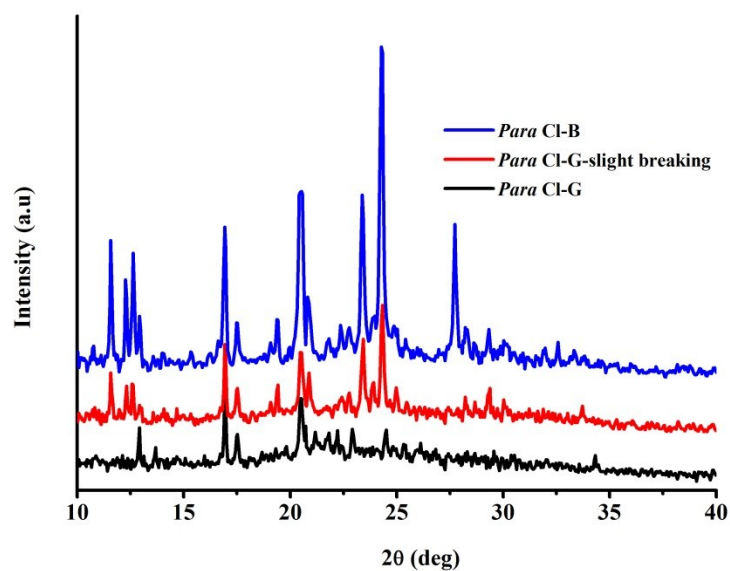

Figure S14. PXRD pattern of *para*-Cl-G before and after slight breaking and comparison with *para*-Cl-B.

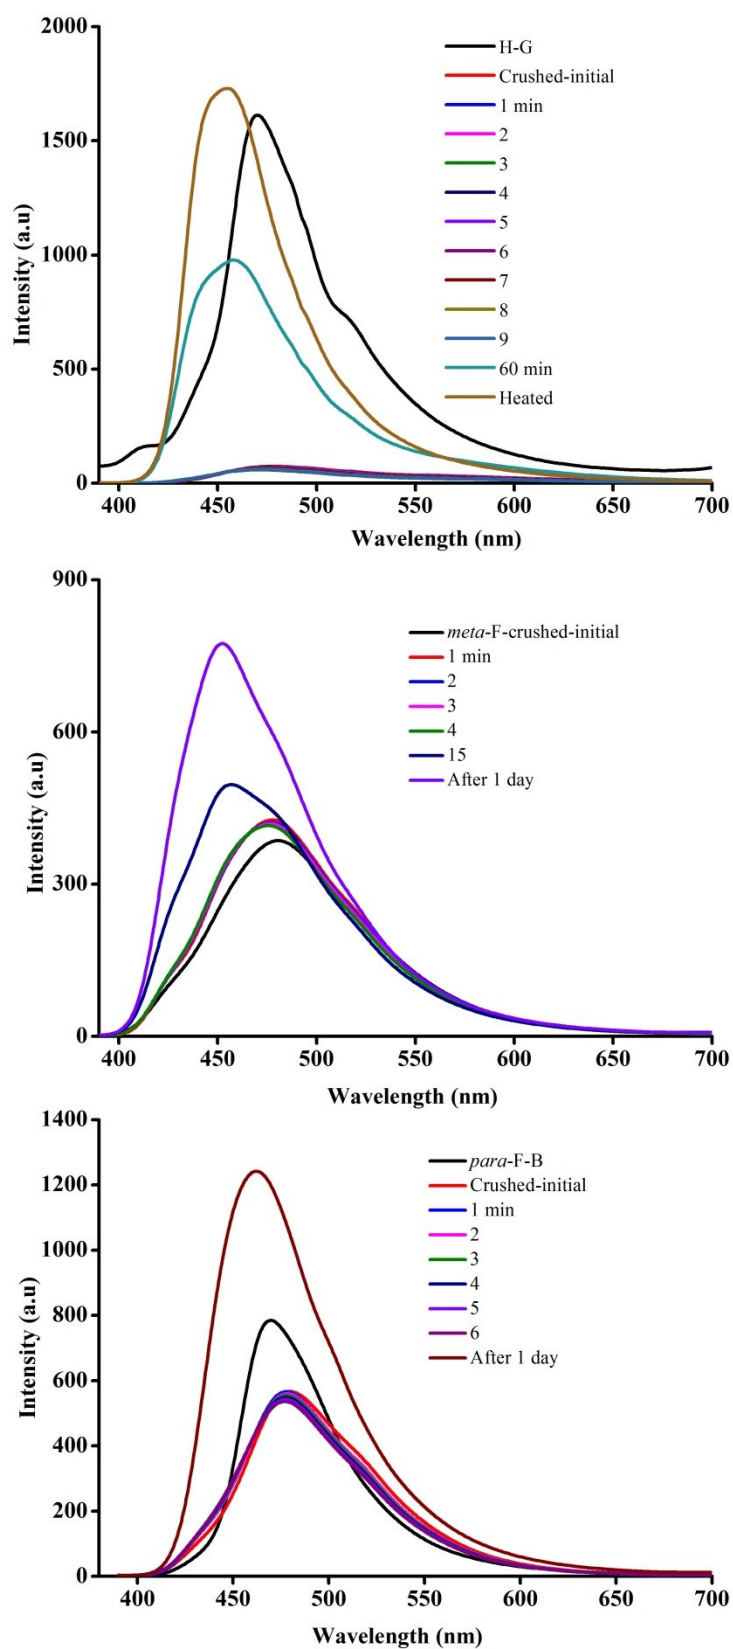

Figure S15. Self-reversible mechanofluorochromism.  $\lambda_{\text{ex}} = 360$  nm.

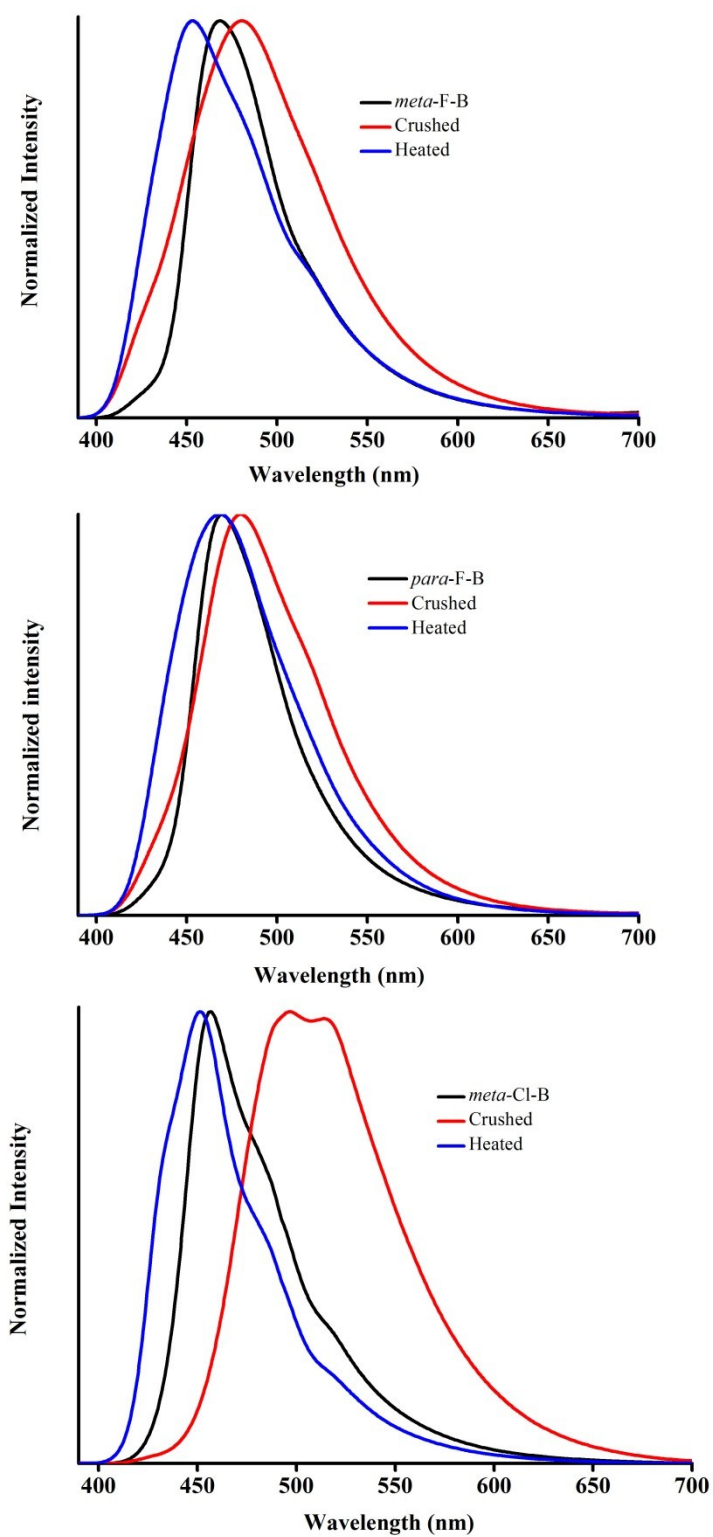

Figure S16. Reversible mechanofluorochromism.  $\lambda_{\text{ex}} = 360 \text{ nm}$ .



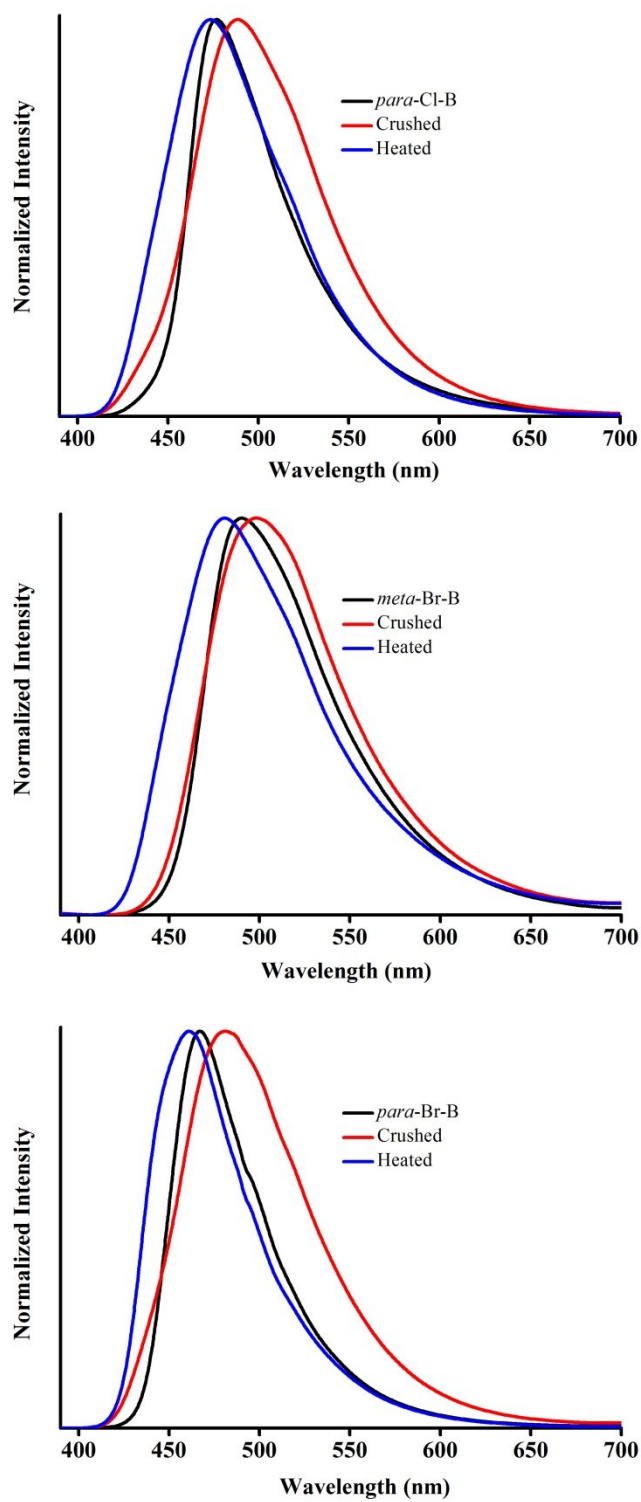

Figure S17. Reversible mechanofluorochromism.  $\lambda_{\text{ex}} = 360$  nm.

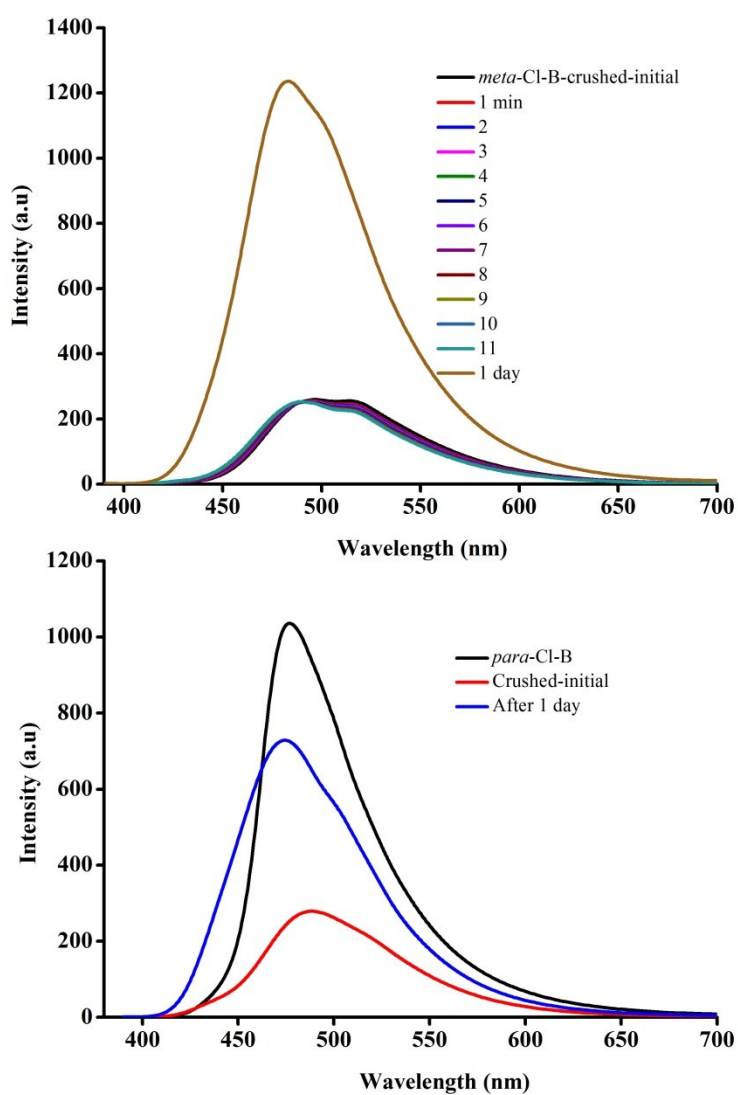

Figure S18. Self-reversible mechanofluorochromism.  $\lambda_{\text{ex}} = 360$  nm.



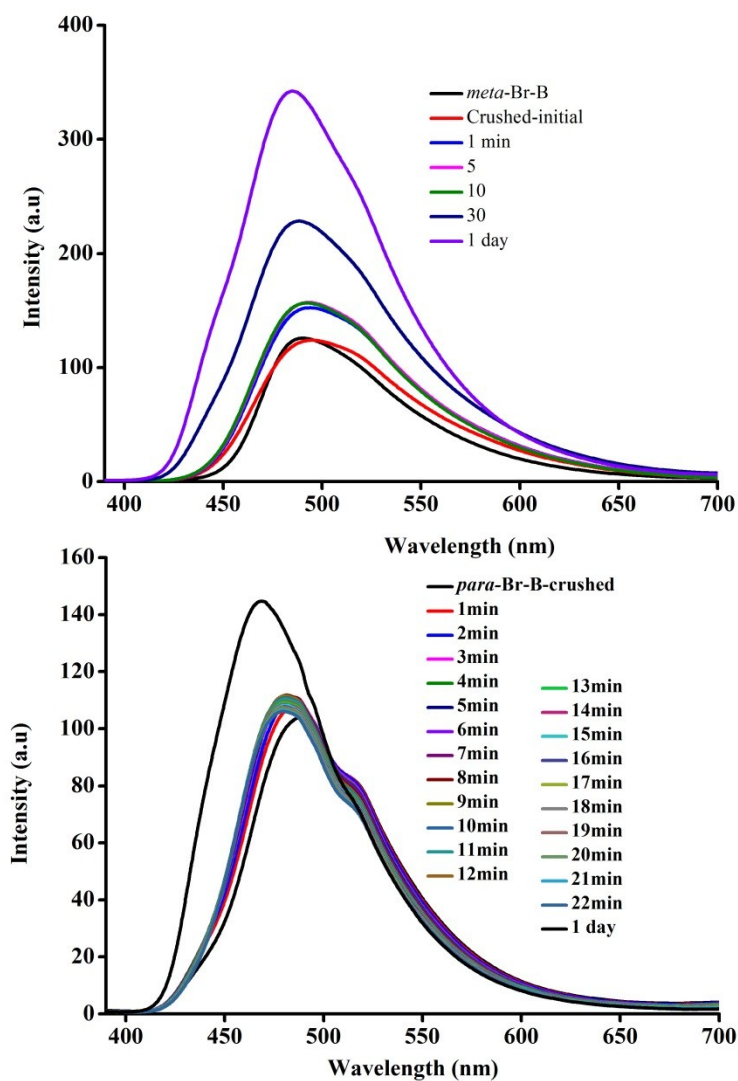

Figure S19. Self-reversible mechanofluorochromism.  $\lambda_{\text{ex}} = 360$  nm.

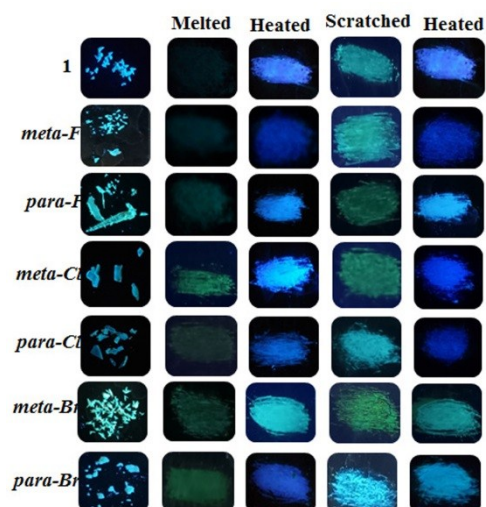

Figure S20. Digital images of crystallization induced fluorescence switching.  $\lambda_{\text{ex}} = 365$  nm.

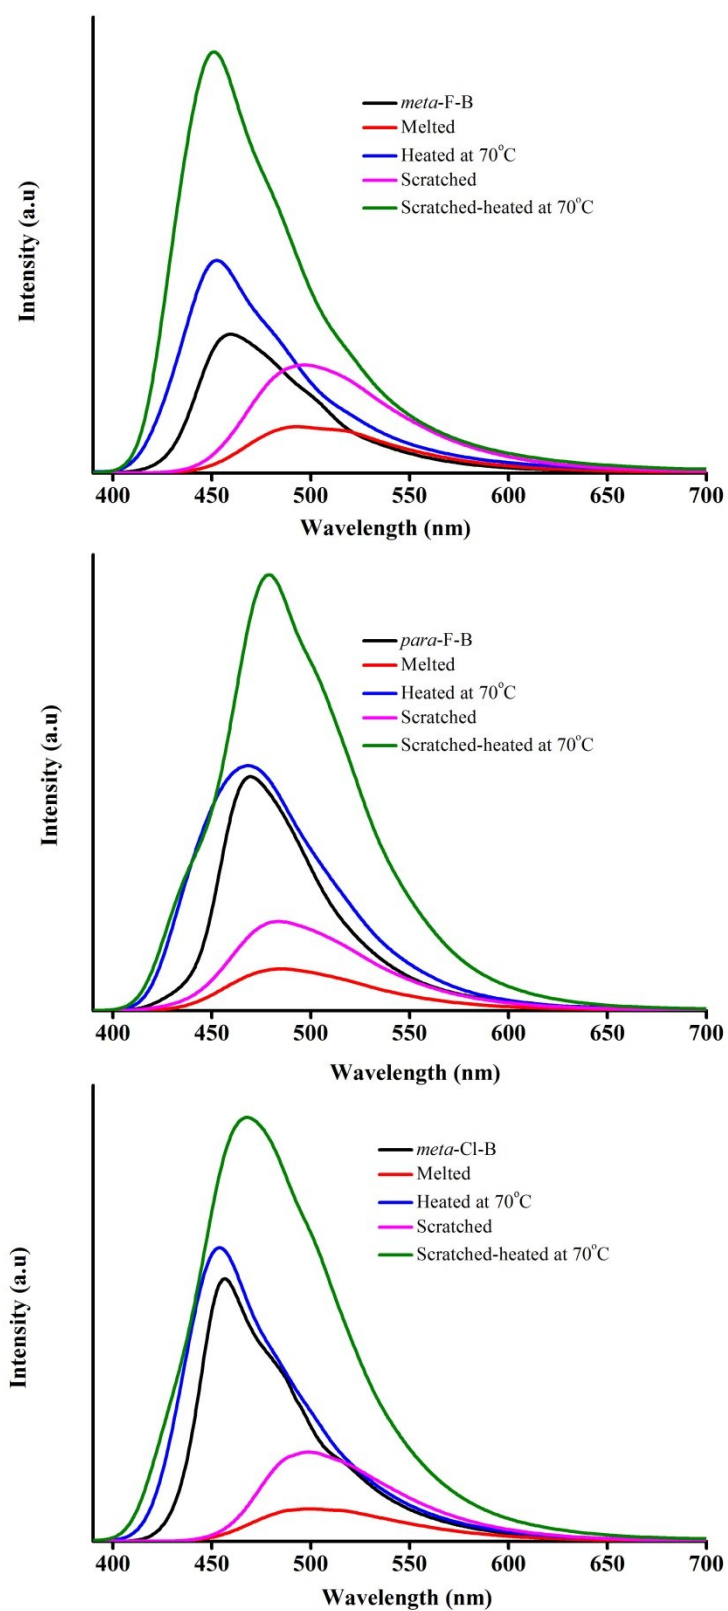

Figure S21. Fluorescence spectra of crystallization induced fluorescence switching.  $\lambda_{\text{ex}} = 360$  nm.

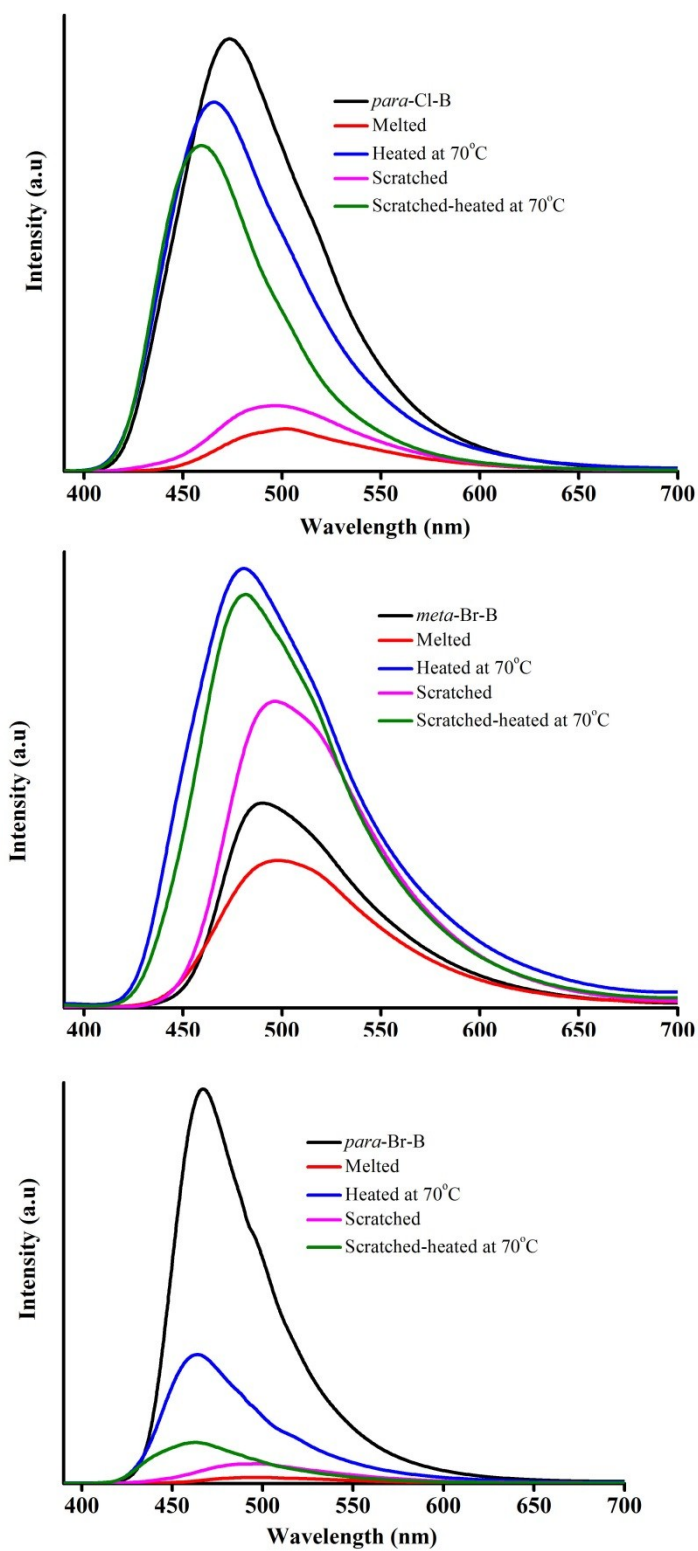

Figure S22. Fluorescence spectra of crystallization induced fluorescence switching.  $\lambda_{\text{ex}} = 360$  nm.

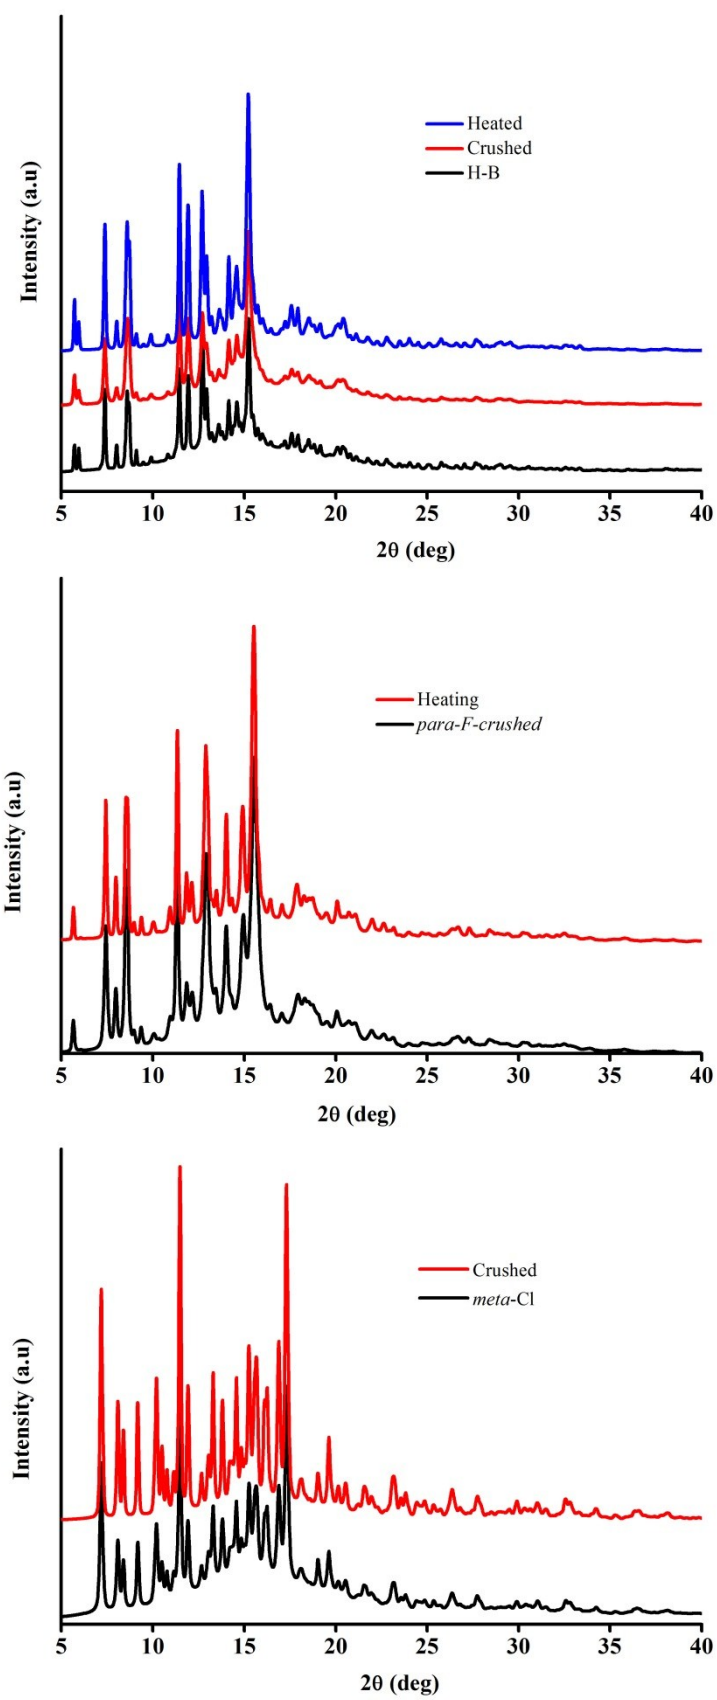

Figure S23. PXR D pattern.

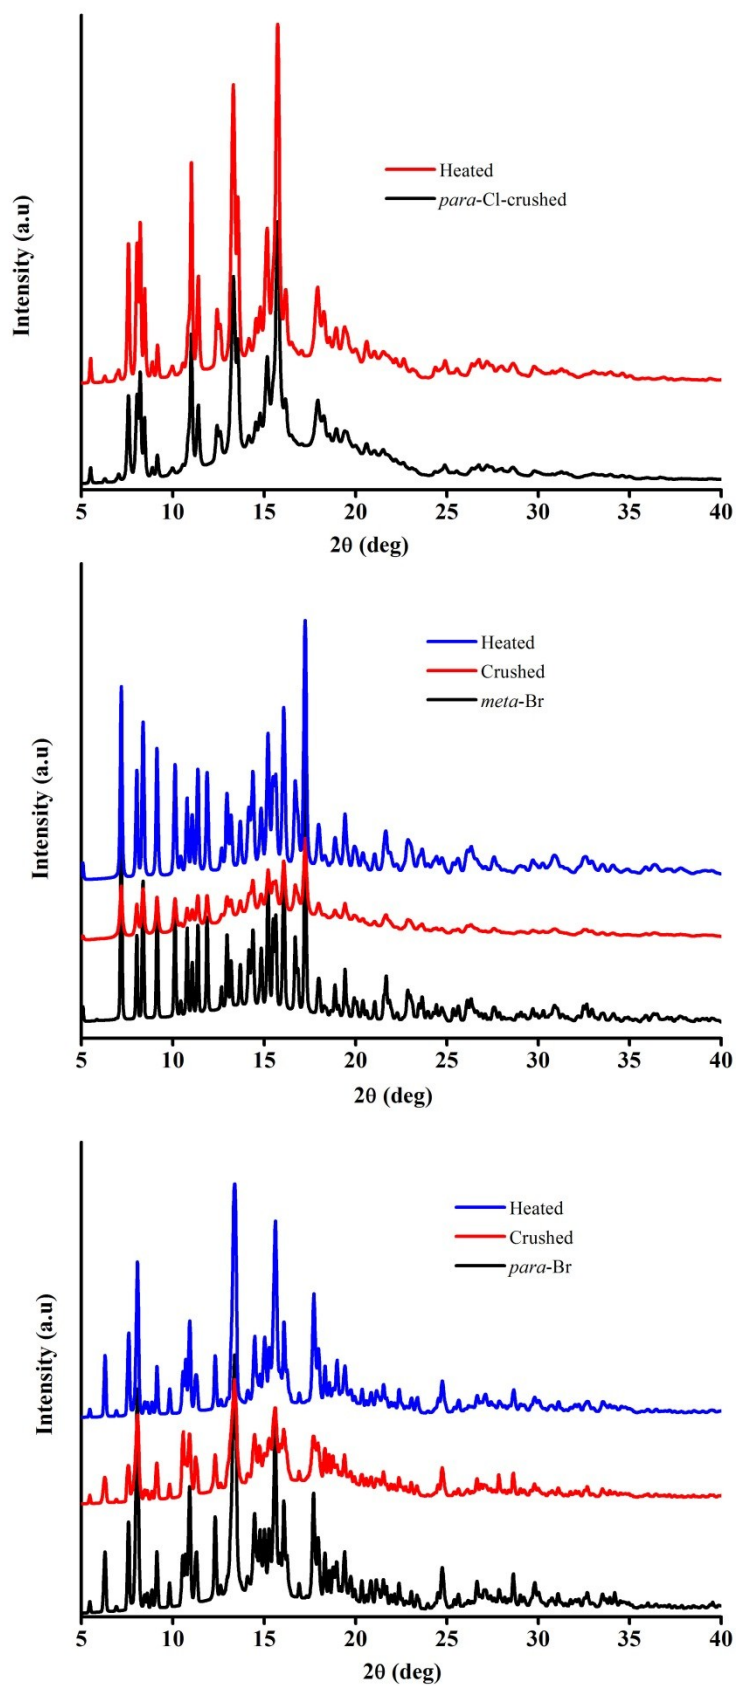

Figure S24. PXR D pattern.

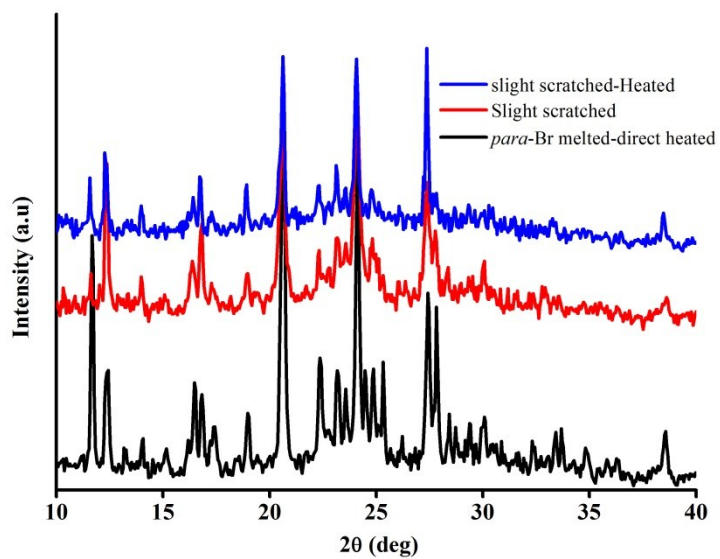

Figure S25. PXRD pattern.

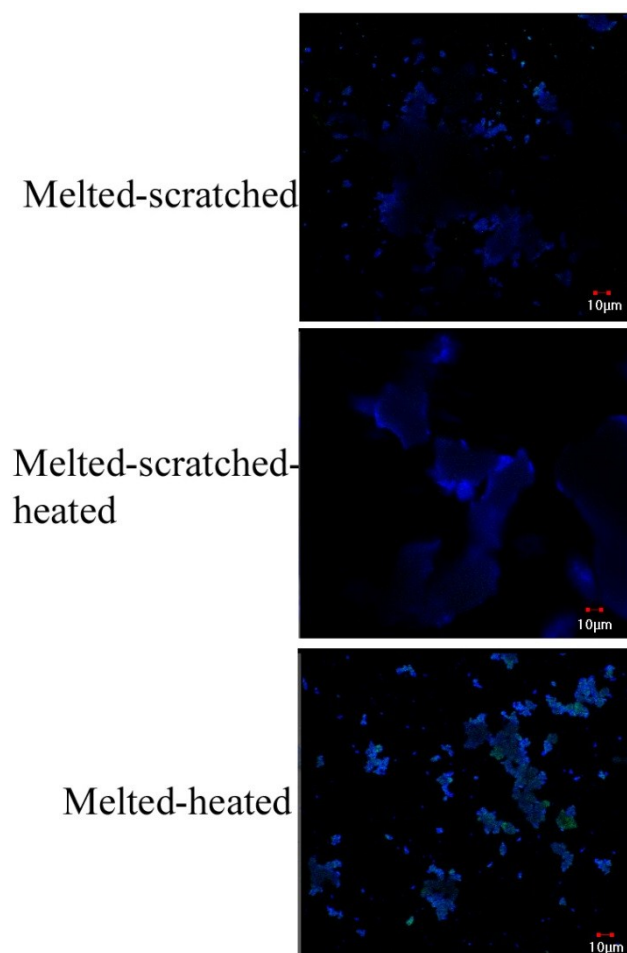

Figure S26. Confocal fluorescence image of *para*-Br-B.
